# Supplementary material
Source: Research Square preprint supplement (doi:10.21203/rs.3.rs-8536279/v1)
Supplement: Supplementary file 1 [file f4f7a2058b898a463ca5e0cd.xlsx]

## Sheet: Skin Tone Article SPSS data
SEX	Person	RED	GREEN	BLUE	AvgRGB	Source	Palette	MAH_1	CHI3_95	CHI3_99	ODD_95	ODD_99
1	1809	71	55	48	58	0		20.1259	7.81473	11.3449	1	1
1	7	105	54	35	65	0		9.50198	7.81473	11.3449	1	0
1	1777	77	63	55	65	0		18.6293	7.81473	11.3449	1	1
1	534	90	66	48	68	0		12.0979	7.81473	11.3449	1	1
1	746	81	68	57	69	0		17.0403	7.81473	11.3449	1	1
1	295	99	69	52	73	0		9.94553	7.81473	11.3449	1	0
1	983	92	80	48	73	0		12.0309	7.81473	11.3449	1	1
1	1065	72	77	71	73	0		25.5874	7.81473	11.3449	1	1
1	516	92	82	48	74	0		12.3371	7.81473	11.3449	1	1
0	522	83	86	53	74	0		17.0198	7.81473	11.3449	1	1
1	624	99	80	43	74	0		9.96197	7.81473	11.3449	1	0
1	880	154	8	62	75	0		62.1064	7.81473	11.3449	1	1
0	743	90	88	52	77	0		14.3274	7.81473	11.3449	1	1
0	744	100	79	52	77	0		9.54508	7.81473	11.3449	1	0
1	1709	94	81	61	79	0		12.4527	7.81473	11.3449	1	1
0	1693	114	65	58	79	0		8.8371	7.81473	11.3449	1	0
0	1816	105	65	67	79	0		12.4376	7.81473	11.3449	1	1
1	747	95	76	67	79	0		13.336	7.81473	11.3449	1	1
0	598	81	103	61	82	0		23.7816	7.81473	11.3449	1	1
1	1714	92	87	66	82	0		14.4	7.81473	11.3449	1	1
1	806	126	66	54	82	0		7.47698	7.81473	11.3449	0	0
1	553	107	78	62	82	0		8.57324	7.81473	11.3449	1	0
1	1476	92	86	69	82	0		14.8341	7.81473	11.3449	1	1
1	618	115	80	53	83	0		6.34636	7.81473	11.3449	0	0
1	957	122	75	51	83	0		5.87257	7.81473	11.3449	0	0
1	1759	108	71	70	83	0		11.0023	7.81473	11.3449	1	0
1	1822	99	76	74	83	0		13.7728	7.81473	11.3449	1	1
1	1791	102	81	67	83	0		10.5928	7.81473	11.3449	1	0
0	1769	99	75	77	84	0		14.9025	7.81473	11.3449	1	1
1	959	130	79	44	84	0		6.06765	7.81473	11.3449	0	0
1	1758	102	74	77	84	0		14.0855	7.81473	11.3449	1	1
0	1760	115	77	61	84	0		6.90316	7.81473	11.3449	0	0
0	408	121	75	58	85	0		6.14494	7.81473	11.3449	0	0
1	751	116	83	55	85	0		6.19786	7.81473	11.3449	0	0
0	835	115	89	51	85	0		7.07817	7.81473	11.3449	0	0
0	644	128	77	52	86	0		5.45871	7.81473	11.3449	0	0
0	13	138	78	42	86	0		6.95855	7.81473	11.3449	0	0
0	816	117	74	68	86	0		8.10051	7.81473	11.3449	1	0
1	1784	103	82	74	86	0		11.6276	7.81473	11.3449	1	1
1	604	105	93	62	87	0		9.80172	7.81473	11.3449	1	0
0	742	106	92	62	87	0		9.33013	7.81473	11.3449	1	0
1	982	119	84	57	87	0		5.7299	7.81473	11.3449	0	0
1	621	122	93	46	87	0		7.48858	7.81473	11.3449	0	0
0	11	145	82	35	87	0		9.68038	7.81473	11.3449	1	0
1	911	131	76	55	87	0		5.51351	7.81473	11.3449	0	0
1	1807	119	71	72	87	0		9.47163	7.81473	11.3449	1	0
0	1454	126	92	45	88	0		7.12029	7.81473	11.3449	0	0
1	614	121	82	62	88	0		5.62261	7.81473	11.3449	0	0
1	954	119	80	68	89	0		6.69394	7.81473	11.3449	0	0
0	884	137	77	56	90	0		5.54293	7.81473	11.3449	0	0
1	926	138	81	52	90	0		5.35676	7.81473	11.3449	0	0
1	471	120	77	75	91	0		8.38249	7.81473	11.3449	1	0
1	529	122	85	66	91	0		5.499	7.81473	11.3449	0	0
1	898	134	78	61	91	0		5.27683	7.81473	11.3449	0	0
1	588	136	83	56	92	0		4.76803	7.81473	11.3449	0	0
0	638	128	88	59	92	0		4.65895	7.81473	11.3449	0	0
1	292	143	74	59	92	0		6.68945	7.81473	11.3449	0	0
0	546	126	90	60	92	0		4.85029	7.81473	11.3449	0	0
1	676	120	96	60	92	0		6.34912	7.81473	11.3449	0	0
0	740	119	91	66	92	0		5.93397	7.81473	11.3449	0	0
0	1722	125	91	60	92	0		5.01854	7.81473	11.3449	0	0
0	608	119	89	69	92	0		6.06889	7.81473	11.3449	0	0
0	121	135	78	65	93	0		5.47179	7.81473	11.3449	0	0
1	583	133	93	52	93	0		5.47492	7.81473	11.3449	0	0
0	739	126	93	59	93	0		5.10486	7.81473	11.3449	0	0
1	42	140	86	53	93	0		5.08293	7.81473	11.3449	0	0
0	878	137	79	64	93	0		5.23385	7.81473	11.3449	0	0
1	790	143	84	54	94	0		5.27582	7.81473	11.3449	0	0
0	1704	104	97	80	94	0		12.3361	7.81473	11.3449	1	1
0	575	123	99	60	94	0		6.27036	7.81473	11.3449	0	0
0	1775	129	86	68	94	0		4.66184	7.81473	11.3449	0	0
1	229	141	100	43	95	0		9.18745	7.81473	11.3449	1	0
1	657	140	92	52	95	0		5.37392	7.81473	11.3449	0	0
1	817	133	82	69	95	0		5.00756	7.81473	11.3449	0	0
1	337	140	79	66	95	0		5.42298	7.81473	11.3449	0	0
0	401	117	82	86	95	0		10.732	7.81473	11.3449	1	0
1	1344	125	89	71	95	0		5.11814	7.81473	11.3449	0	0
1	931	128	99	59	95	0		5.60583	7.81473	11.3449	0	0
1	25	133	86	68	96	0		4.34701	7.81473	11.3449	0	0
1	616	141	84	62	96	0		4.5166	7.81473	11.3449	0	0
1	690	126	96	65	96	0		4.95668	7.81473	11.3449	0	0
1	735	120	95	72	96	0		6.0894	7.81473	11.3449	0	0
0	18	145	82	61	96	0		5.13329	7.81473	11.3449	0	0
1	442	134	92	62	96	0		4.08452	7.81473	11.3449	0	0
1	499	137	88	64	96	0		3.98608	7.81473	11.3449	0	0
0	536	124	96	69	96	0		5.20887	7.81473	11.3449	0	0
1	728	118	101	71	97	0		7.11479	7.81473	11.3449	0	0
0	1710	121	85	85	97	0		8.78997	7.81473	11.3449	1	0
0	1771	129	89	73	97	0		4.69906	7.81473	11.3449	0	0
0	547	135	86	71	97	0		4.38827	7.81473	11.3449	0	0
0	689	121	100	71	97	0		6.206	7.81473	11.3449	0	0
0	469	133	92	68	98	0		3.90466	7.81473	11.3449	0	0
1	627	146	79	68	98	0		5.9306	7.81473	11.3449	0	0
1	637	136	89	68	98	0		3.88284	7.81473	11.3449	0	0
0	699	131	107	55	98	0		7.87556	7.81473	11.3449	1	0
1	989	143	85	65	98	0		4.38881	7.81473	11.3449	0	0
1	1717	124	97	72	98	0		5.29505	7.81473	11.3449	0	0
0	514	131	91	73	98	0		4.28077	7.81473	11.3449	0	0
0	732	113	103	79	98	0		9.30556	7.81473	11.3449	1	0
1	595	135	104	57	99	0		6.18642	7.81473	11.3449	0	0
1	685	139	98	59	99	0		4.59318	7.81473	11.3449	0	0
1	734	125	95	76	99	0		5.25329	7.81473	11.3449	0	0
1	745	129	88	79	99	0		5.51431	7.81473	11.3449	0	0
1	599	130	94	73	99	0		4.25263	7.81473	11.3449	0	0
1	801	134	94	69	99	0		3.75833	7.81473	11.3449	0	0
0	1686	124	100	73	99	0		5.5113	7.81473	11.3449	0	0
0	1226	132	103	63	99	0		5.1879	7.81473	11.3449	0	0
0	656	148	94	57	100	0		4.95698	7.81473	11.3449	0	0
0	1764	133	86	81	100	0		5.72109	7.81473	11.3449	0	0
0	580	120	122	59	100	0		15.4183	7.81473	11.3449	1	1
1	662	137	101	63	100	0		4.39363	7.81473	11.3449	0	0
0	811	122	91	88	100	0		8.18611	7.81473	11.3449	1	0
1	930	142	98	62	101	0		4.0595	7.81473	11.3449	0	0
1	955	144	91	67	101	0		3.64721	7.81473	11.3449	0	0
1	798	132	103	68	101	0		4.58563	7.81473	11.3449	0	0
0	904	144	92	67	101	0		3.56913	7.81473	11.3449	0	0
1	1707	108	105	90	101	0		13.0912	7.81473	11.3449	1	1
1	1821	122	99	82	101	0		6.5113	7.81473	11.3449	0	0
1	660	145	98	61	101	0		4.24118	7.81473	11.3449	0	0
0	854	132	112	60	101	0		8.03763	7.81473	11.3449	1	0
0	1668	120	111	73	101	0		8.47893	7.81473	11.3449	1	0
0	390	155	98	52	102	0		7.19418	7.81473	11.3449	0	0
1	570	139	101	65	102	0		3.98127	7.81473	11.3449	0	0
1	1277	136	101	68	102	0		3.88038	7.81473	11.3449	0	0
0	483	152	101	53	102	0		6.85984	7.81473	11.3449	0	0
1	1812	140	94	72	102	0		3.31801	7.81473	11.3449	0	0
0	645	157	91	59	102	0		5.82288	7.81473	11.3449	0	0
1	1052	133	96	78	102	0		3.99488	7.81473	11.3449	0	0
1	584	135	89	84	103	0		5.37357	7.81473	11.3449	0	0
1	956	149	95	64	103	0		3.91118	7.81473	11.3449	0	0
1	234	163	82	64	103	0		8.06415	7.81473	11.3449	1	0
0	367	132	96	81	103	0		4.37699	7.81473	11.3449	0	0
1	540	140	104	65	103	0		4.27027	7.81473	11.3449	0	0
1	940	145	93	71	103	0		3.33244	7.81473	11.3449	0	0
1	515	135	94	81	103	0		4.14666	7.81473	11.3449	0	0
0	848	138	85	87	103	0		6.732	7.81473	11.3449	0	0
0	1781	142	96	72	103	0		3.13122	7.81473	11.3449	0	0
0	881	156	102	53	104	0		7.46965	7.81473	11.3449	0	0
1	85	143	89	80	104	0		4.30081	7.81473	11.3449	0	0
0	309	149	103	60	104	0		5.0289	7.81473	11.3449	0	0
1	314	146	92	74	104	0		3.42969	7.81473	11.3449	0	0
1	643	138	112	62	104	0		6.74466	7.81473	11.3449	0	0
1	986	144	96	72	104	0		3.08206	7.81473	11.3449	0	0
1	594	124	95	94	104	0		8.54692	7.81473	11.3449	1	0
1	928	143	90	80	104	0		4.09329	7.81473	11.3449	0	0
1	932	136	104	73	104	0		3.75075	7.81473	11.3449	0	0
0	1138	116	102	96	105	0		11.0175	7.81473	11.3449	1	0
1	805	122	103	90	105	0		7.64506	7.81473	11.3449	0	0
0	552	145	88	83	105	0		4.86959	7.81473	11.3449	0	0
0	1191	152	97	67	105	0		3.67339	7.81473	11.3449	0	0
0	826	130	90	98	106	0		9.39545	7.81473	11.3449	1	0
0	422	152	88	79	106	0		4.6756	7.81473	11.3449	0	0
0	706	130	110	79	106	0		5.2729	7.81473	11.3449	0	0
0	822	145	106	68	106	0		3.78827	7.81473	11.3449	0	0
0	836	153	107	59	106	0		6.09091	7.81473	11.3449	0	0
1	561	138	113	69	107	0		5.48554	7.81473	11.3449	0	0
1	738	149	89	82	107	0		4.53001	7.81473	11.3449	0	0
1	793	135	106	79	107	0		3.81794	7.81473	11.3449	0	0
0	953	153	91	76	107	0		3.9367	7.81473	11.3449	0	0
0	1360	158	97	65	107	0		4.5848	7.81473	11.3449	0	0
0	1748	133	100	87	107	0		4.57074	7.81473	11.3449	0	0
0	767	136	111	74	107	0		4.61558	7.81473	11.3449	0	0
0	1231	167	86	68	107	0		7.69741	7.81473	11.3449	0	0
1	531	145	95	82	107	0		3.3139	7.81473	11.3449	0	0
1	581	145	97	80	107	0		2.95163	7.81473	11.3449	0	0
0	647	146	90	86	107	0		4.75661	7.81473	11.3449	0	0
1	809	142	104	77	108	0		2.88618	7.81473	11.3449	0	0
0	500	148	97	79	108	0		2.86366	7.81473	11.3449	0	0
0	725	155	93	76	108	0		3.72548	7.81473	11.3449	0	0
1	737	152	111	61	108	0		6.22856	7.81473	11.3449	0	0
1	906	152	92	80	108	0		3.79146	7.81473	11.3449	0	0
1	961	145	102	77	108	0		2.66305	7.81473	11.3449	0	0
0	1494	155	82	87	108	0		8.03599	7.81473	11.3449	1	0
0	504	153	106	66	108	0		4.19727	7.81473	11.3449	0	0
0	634	147	93	85	108	0		3.89504	7.81473	11.3449	0	0
1	1305	136	103	86	108	0		3.79243	7.81473	11.3449	0	0
0	532	145	91	90	109	0		5.18043	7.81473	11.3449	0	0
1	895	148	107	71	109	0		3.33511	7.81473	11.3449	0	0
0	1214	146	104	76	109	0		2.67903	7.81473	11.3449	0	0
1	1439	134	103	89	109	0		4.44362	7.81473	11.3449	0	0
1	951	134	102	91	109	0		4.7604	7.81473	11.3449	0	0
0	1355	156	110	61	109	0		6.23381	7.81473	11.3449	0	0
1	876	153	96	79	109	0		3.09142	7.81473	11.3449	0	0
1	1523	114	111	103	109	0		13.7181	7.81473	11.3449	1	1
0	539	146	112	71	110	0		4.1055	7.81473	11.3449	0	0
1	572	145	99	85	110	0		2.97421	7.81473	11.3449	0	0
1	804	148	101	80	110	0		2.5118	7.81473	11.3449	0	0
1	1254	135	117	77	110	0		5.74321	7.81473	11.3449	0	0
1	467	149	106	75	110	0		2.72921	7.81473	11.3449	0	0
1	800	143	109	78	110	0		3.03393	7.81473	11.3449	0	0
1	144	175	96	60	110	0		9.55913	7.81473	11.3449	1	0
0	700	150	124	57	110	0		12.0163	7.81473	11.3449	1	1
0	877	156	105	70	110	0		3.52339	7.81473	11.3449	0	0
0	879	152	102	77	110	0		2.5452	7.81473	11.3449	0	0
0	1303	169	95	67	110	0		6.4928	7.81473	11.3449	0	0
1	1574	125	109	97	110	0		7.9239	7.81473	11.3449	1	0
0	646	160	102	70	111	0		3.85139	7.81473	11.3449	0	0
0	999	151	90	91	111	0		5.56189	7.81473	11.3449	0	0
0	1000	155	97	80	111	0		3.04161	7.81473	11.3449	0	0
1	1466	121	121	90	111	0		10.3801	7.81473	11.3449	1	0
0	1352	134	114	85	111	0		4.80333	7.81473	11.3449	0	0
1	670	158	123	53	111	0		13.571	7.81473	11.3449	1	1
1	765	149	124	61	111	0		10.394	7.81473	11.3449	1	0
1	1506	138	101	95	111	0		4.76565	7.81473	11.3449	0	0
0	602	149	105	81	112	0		2.29327	7.81473	11.3449	0	0
1	693	158	106	71	112	0		3.52582	7.81473	11.3449	0	0
0	792	153	107	75	112	0		2.74633	7.81473	11.3449	0	0
0	903	164	106	65	112	0		5.51089	7.81473	11.3449	0	0
1	1683	140	105	90	112	0		3.39454	7.81473	11.3449	0	0
1	797	130	109	97	112	0		6.36426	7.81473	11.3449	0	0
0	1058	156	84	97	112	0		9.53671	7.81473	11.3449	1	0
0	764	148	113	77	113	0		3.16069	7.81473	11.3449	0	0
1	1286	131	105	102	113	0		7.31339	7.81473	11.3449	0	0
1	703	154	107	78	113	0		2.41596	7.81473	11.3449	0	0
0	841	154	113	72	113	0		3.82776	7.81473	11.3449	0	0
0	910	154	96	89	113	0		3.64863	7.81473	11.3449	0	0
1	1450	131	114	94	113	0		5.90638	7.81473	11.3449	0	0
0	1457	158	110	71	113	0		3.79149	7.81473	11.3449	0	0
1	922	167	95	78	113	0		4.8937	7.81473	11.3449	0	0
0	946	139	122	79	113	0		5.98387	7.81473	11.3449	0	0
0	958	151	94	95	113	0		5.05796	7.81473	11.3449	0	0
1	45	146	102	93	114	0		3.25681	7.81473	11.3449	0	0
0	331	167	108	66	114	0		5.84704	7.81473	11.3449	0	0
1	431	168	97	76	114	0		4.81988	7.81473	11.3449	0	0
1	521	156	120	65	114	0		7.34478	7.81473	11.3449	0	0
0	39	171	92	79	114	0		6.44149	7.81473	11.3449	0	0
0	377	163	100	79	114	0		3.34661	7.81473	11.3449	0	0
0	533	168	82	92	114	0		10.9603	7.81473	11.3449	1	0
0	623	150	113	79	114	0		2.77047	7.81473	11.3449	0	0
1	984	146	108	89	114	0		2.43533	7.81473	11.3449	0	0
0	992	162	93	88	114	0		4.88868	7.81473	11.3449	0	0
0	1804	153	109	81	114	0		2.18488	7.81473	11.3449	0	0
1	786	151	109	84	115	0		2.06446	7.81473	11.3449	0	0
1	1767	148	106	90	115	0		2.38407	7.81473	11.3449	0	0
0	518	162	100	84	115	0		3.05846	7.81473	11.3449	0	0
1	772	151	111	84	115	0		2.1071	7.81473	11.3449	0	0
0	1364	138	121	87	115	0		5.05042	7.81473	11.3449	0	0
0	719	144	109	94	116	0		2.94407	7.81473	11.3449	0	0
1	1718	154	113	80	116	0		2.47948	7.81473	11.3449	0	0
0	266	177	98	73	116	0		7.12724	7.81473	11.3449	0	0
0	312	158	102	88	116	0		2.51427	7.81473	11.3449	0	0
1	601	161	102	85	116	0		2.64667	7.81473	11.3449	0	0
1	1636	140	112	96	116	0		3.76356	7.81473	11.3449	0	0
0	1794	145	110	93	116	0		2.69488	7.81473	11.3449	0	0
1	231	163	108	78	116	0		2.85518	7.81473	11.3449	0	0
0	335	167	107	75	116	0		3.79901	7.81473	11.3449	0	0
1	486	146	117	86	116	0		2.95466	7.81473	11.3449	0	0
1	1373	148	113	88	116	0		2.26576	7.81473	11.3449	0	0
0	429	155	107	88	117	0		1.91269	7.81473	11.3449	0	0
0	443	161	102	87	117	0		2.64461	7.81473	11.3449	0	0
0	865	149	116	85	117	0		2.55546	7.81473	11.3449	0	0
0	1298	174	84	92	117	0		11.2709	7.81473	11.3449	1	0
1	254	160	99	92	117	0		3.43626	7.81473	11.3449	0	0
0	512	154	98	99	117	0		4.58043	7.81473	11.3449	0	0
0	755	148	119	84	117	0		3.17558	7.81473	11.3449	0	0
0	1026	170	103	78	117	0		4.09956	7.81473	11.3449	0	0
1	1107	131	124	96	117	0		7.52951	7.81473	11.3449	0	0
0	262	167	106	80	118	0		3.12124	7.81473	11.3449	0	0
0	592	157	108	88	118	0		1.82607	7.81473	11.3449	0	0
0	962	170	112	71	118	0		5.26006	7.81473	11.3449	0	0
1	1313	147	114	92	118	0		2.39913	7.81473	11.3449	0	0
1	344	178	95	81	118	0		7.26609	7.81473	11.3449	0	0
1	393	182	92	80	118	0		9.48161	7.81473	11.3449	1	0
0	775	199	142	13	118	0		71.1233	7.81473	11.3449	1	1
1	820	164	115	75	118	0		3.82765	7.81473	11.3449	0	0
0	1348	151	110	93	118	0		2.02619	7.81473	11.3449	0	0
1	556	143	118	94	118	0		3.33545	7.81473	11.3449	0	0
1	757	157	113	85	118	0		1.88802	7.81473	11.3449	0	0
1	1374	153	124	78	118	0		4.79944	7.81473	11.3449	0	0
1	891	157	114	85	119	0		1.92539	7.81473	11.3449	0	0
0	1593	149	108	99	119	0		2.89032	7.81473	11.3449	0	0
0	1255	177	99	81	119	0		5.96598	7.81473	11.3449	0	0
0	1749	144	113	100	119	0		3.37446	7.81473	11.3449	0	0
1	1597	146	106	106	119	0		4.82604	7.81473	11.3449	0	0
0	1685	162	117	79	119	0		3.08479	7.81473	11.3449	0	0
0	557	155	116	88	120	0		1.85025	7.81473	11.3449	0	0
0	669	158	116	85	120	0		2.0215	7.81473	11.3449	0	0
0	1111	140	119	100	120	0		4.35786	7.81473	11.3449	0	0
1	872	167	109	84	120	0		2.48539	7.81473	11.3449	0	0
1	912	164	97	99	120	0		5.15521	7.81473	11.3449	0	0
0	973	170	98	92	120	0		4.72109	7.81473	11.3449	0	0
0	1057	163	98	99	120	0		4.75161	7.81473	11.3449	0	0
0	708	165	116	80	120	0		2.94663	7.81473	11.3449	0	0
1	907	163	103	95	120	0		2.91319	7.81473	11.3449	0	0
1	1385	150	123	88	120	0		3.16059	7.81473	11.3449	0	0
0	651	169	104	89	121	0		3.05309	7.81473	11.3449	0	0
1	927	155	113	94	121	0		1.63269	7.81473	11.3449	0	0
1	1180	160	110	92	121	0		1.64835	7.81473	11.3449	0	0
0	507	162	110	91	121	0		1.68741	7.81473	11.3449	0	0
1	1053	167	101	95	121	0		3.70575	7.81473	11.3449	0	0
1	1291	154	106	103	121	0		3.32882	7.81473	11.3449	0	0
1	762	170	121	73	121	0		5.82962	7.81473	11.3449	0	0
1	22	176	115	74	122	0		5.70062	7.81473	11.3449	0	0
0	122	154	113	98	122	0		1.84689	7.81473	11.3449	0	0
1	513	162	126	77	122	0		5.25997	7.81473	11.3449	0	0
0	978	156	121	88	122	0		2.24871	7.81473	11.3449	0	0
0	979	157	113	95	122	0		1.53678	7.81473	11.3449	0	0
1	36	176	100	90	122	0		5.1343	7.81473	11.3449	0	0
0	320	172	105	89	122	0		3.27759	7.81473	11.3449	0	0
1	527	161	118	87	122	0		1.8917	7.81473	11.3449	0	0
0	1325	166	119	82	122	0		2.89054	7.81473	11.3449	0	0
0	32	172	109	87	123	0		2.80605	7.81473	11.3449	0	0
0	675	164	111	93	123	0		1.62797	7.81473	11.3449	0	0
0	748	156	109	103	123	0		2.63276	7.81473	11.3449	0	0
1	1067	143	115	110	123	0		5.04008	7.81473	11.3449	0	0
1	1408	149	126	93	123	0		3.38298	7.81473	11.3449	0	0
0	1789	156	111	102	123	0		2.21182	7.81473	11.3449	0	0
0	1808	165	96	108	123	0		7.51122	7.81473	11.3449	0	0
0	630	156	130	84	123	0		4.80856	7.81473	11.3449	0	0
1	1095	139	118	113	123	0		6.56259	7.81473	11.3449	0	0
1	1793	166	119	85	123	0		2.34763	7.81473	11.3449	0	0
1	541	159	119	93	124	0		1.46281	7.81473	11.3449	0	0
1	565	156	122	93	124	0		1.88584	7.81473	11.3449	0	0
1	1219	157	114	101	124	0		1.72678	7.81473	11.3449	0	0
1	29	180	107	86	124	0		4.62422	7.81473	11.3449	0	0
0	342	168	116	89	124	0		1.80377	7.81473	11.3449	0	0
0	383	177	102	94	124	0		4.82262	7.81473	11.3449	0	0
0	929	164	103	106	124	0		4.39424	7.81473	11.3449	0	0
1	1747	145	126	102	124	0		3.94949	7.81473	11.3449	0	0
1	187	172	101	101	125	0		4.87169	7.81473	11.3449	0	0
0	569	166	121	87	125	0		2.18794	7.81473	11.3449	0	0
0	726	164	109	101	125	0		2.2062	7.81473	11.3449	0	0
0	519	157	113	106	125	0		2.33554	7.81473	11.3449	0	0
0	970	155	137	84	125	0		7.31216	7.81473	11.3449	0	0
1	1575	156	105	115	125	0		6.15662	7.81473	11.3449	0	0
1	1770	162	112	102	125	0		1.79715	7.81473	11.3449	0	0
1	759	166	126	85	126	0		3.24204	7.81473	11.3449	0	0
0	578	169	130	79	126	0		5.87199	7.81473	11.3449	0	0
0	162	177	134	70	127	0		11.4694	7.81473	11.3449	1	1
1	415	184	105	92	127	0		5.55469	7.81473	11.3449	0	0
1	971	173	131	77	127	0		7.09961	7.81473	11.3449	0	0
0	1598	160	124	97	127	0		1.46368	7.81473	11.3449	0	0
0	736	176	121	85	127	0		3.34932	7.81473	11.3449	0	0
0	781	176	133	73	127	0		9.62499	7.81473	11.3449	1	0
0	995	166	114	102	127	0		1.49652	7.81473	11.3449	0	0
1	87	181	101	101	128	0		6.37347	7.81473	11.3449	0	0
1	430	170	128	87	128	0		3.23627	7.81473	11.3449	0	0
1	63	184	110	92	129	0		4.42897	7.81473	11.3449	0	0
0	82	175	119	92	129	0		1.99902	7.81473	11.3449	0	0
0	517	165	117	104	129	0		1.25166	7.81473	11.3449	0	0
1	198	170	111	106	129	0		2.43985	7.81473	11.3449	0	0
1	524	172	110	105	129	0		2.69334	7.81473	11.3449	0	0
0	674	158	121	108	129	0		1.71021	7.81473	11.3449	0	0
1	934	169	127	91	129	0		2.23807	7.81473	11.3449	0	0
0	1197	182	114	91	129	0		3.50021	7.81473	11.3449	0	0
0	658	171	107	110	129	0		4.12654	7.81473	11.3449	0	0
0	808	177	113	98	129	0		2.34118	7.81473	11.3449	0	0
0	1123	145	127	116	129	0		5.31967	7.81473	11.3449	0	0
1	1761	167	112	109	129	0		2.49675	7.81473	11.3449	0	0
1	709	179	118	92	130	0		2.53403	7.81473	11.3449	0	0
0	950	165	115	109	130	0		1.93564	7.81473	11.3449	0	0
1	1656	165	118	106	130	0		1.26042	7.81473	11.3449	0	0
1	923	169	112	109	130	0		2.52011	7.81473	11.3449	0	0
1	1054	175	114	101	130	0		1.93374	7.81473	11.3449	0	0
0	1092	163	112	115	130	0		3.6312	7.81473	11.3449	0	0
1	1251	148	121	121	130	0		5.72745	7.81473	11.3449	0	0
0	1097	152	128	111	130	0		2.99876	7.81473	11.3449	0	0
1	1403	156	135	100	130	0		3.41139	7.81473	11.3449	0	0
1	914	189	121	82	131	0		6.63486	7.81473	11.3449	0	0
0	436	175	124	94	131	0		1.77518	7.81473	11.3449	0	0
0	555	158	124	111	131	0		1.86084	7.81473	11.3449	0	0
1	591	171	123	99	131	0		1.01686	7.81473	11.3449	0	0
1	862	164	134	95	131	0		2.90973	7.81473	11.3449	0	0
0	1210	169	130	94	131	0		2.13369	7.81473	11.3449	0	0
1	1262	172	128	93	131	0		2.08006	7.81473	11.3449	0	0
0	1396	160	133	100	131	0		2.40253	7.81473	11.3449	0	0
1	149	177	114	103	131	0		2.16664	7.81473	11.3449	0	0
0	257	198	119	77	131	0		11.06	7.81473	11.3449	1	0
0	1493	163	138	93	131	0		4.44425	7.81473	11.3449	0	0
1	1648	159	120	115	131	0		2.50789	7.81473	11.3449	0	0
0	538	163	126	106	132	0		1.05847	7.81473	11.3449	0	0
0	779	161	129	105	132	0		1.42709	7.81473	11.3449	0	0
1	1535	161	110	124	132	0		6.78114	7.81473	11.3449	0	0
0	503	174	126	96	132	0		1.52298	7.81473	11.3449	0	0
0	576	166	134	96	132	0		2.59946	7.81473	11.3449	0	0
1	812	184	120	92	132	0		3.26212	7.81473	11.3449	0	0
0	990	183	120	93	132	0		2.92841	7.81473	11.3449	0	0
1	1142	154	127	115	132	0		2.9365	7.81473	11.3449	0	0
1	1265	170	123	103	132	0		0.806904	7.81473	11.3449	0	0
0	1295	175	126	95	132	0		1.72292	7.81473	11.3449	0	0
0	1726	167	125	104	132	0		0.814079	7.81473	11.3449	0	0
0	554	172	125	100	132	0		0.98096	7.81473	11.3449	0	0
1	697	157	147	93	132	0		8.71279	7.81473	11.3449	1	0
0	1317	180	140	77	132	0		10.7804	7.81473	11.3449	1	0
0	1516	184	109	104	132	0		4.47019	7.81473	11.3449	0	0
0	1557	173	128	96	132	0		1.62374	7.81473	11.3449	0	0
0	26	172	128	98	133	0		1.32521	7.81473	11.3449	0	0
1	134	175	121	102	133	0		1.09659	7.81473	11.3449	0	0
0	832	166	120	112	133	0		1.48346	7.81473	11.3449	0	0
1	1503	156	143	99	133	0		5.90357	7.81473	11.3449	0	0
1	1573	164	118	116	133	0		2.45864	7.81473	11.3449	0	0
1	936	171	118	110	133	0		1.47864	7.81473	11.3449	0	0
1	1413	164	138	97	133	0		3.5157	7.81473	11.3449	0	0
0	1440	179	135	85	133	0		5.87535	7.81473	11.3449	0	0
1	571	179	132	89	133	0		4.00956	7.81473	11.3449	0	0
1	773	173	134	93	133	0		3.04891	7.81473	11.3449	0	0
0	692	185	122	94	134	0		3.03663	7.81473	11.3449	0	0
1	756	181	124	96	134	0		2.08516	7.81473	11.3449	0	0
1	1093	155	132	114	134	0		2.84293	7.81473	11.3449	0	0
0	636	187	127	88	134	0		4.80809	7.81473	11.3449	0	0
1	1116	152	135	115	134	0		3.92943	7.81473	11.3449	0	0
1	1462	167	132	103	134	0		1.29551	7.81473	11.3449	0	0
1	1785	171	121	110	134	0		1.06018	7.81473	11.3449	0	0
0	548	171	122	110	134	0		0.949611	7.81473	11.3449	0	0
1	1501	158	143	102	134	0		4.99729	7.81473	11.3449	0	0
1	1787	173	118	112	134	0		1.68756	7.81473	11.3449	0	0
0	1805	177	126	100	134	0		1.2106	7.81473	11.3449	0	0
0	109	190	113	101	135	0		4.65264	7.81473	11.3449	0	0
0	232	191	115	98	135	0		4.63725	7.81473	11.3449	0	0
0	707	187	120	97	135	0		3.11573	7.81473	11.3449	0	0
0	780	146	147	111	135	0		8.69706	7.81473	11.3449	1	0
0	600	187	125	93	135	0		3.53892	7.81473	11.3449	0	0
0	831	176	117	112	135	0		2.00093	7.81473	11.3449	0	0
1	1135	153	136	116	135	0		3.86001	7.81473	11.3449	0	0
1	1713	166	123	116	135	0		1.56836	7.81473	11.3449	0	0
0	1750	173	126	106	135	0		0.659391	7.81473	11.3449	0	0
1	57	201	117	88	135	0		9.02594	7.81473	11.3449	1	0
0	1096	164	130	112	135	0		1.15542	7.81473	11.3449	0	0
1	1765	171	114	121	135	0		4.11636	7.81473	11.3449	0	0
0	35	192	121	94	136	0		4.58052	7.81473	11.3449	0	0
1	1090	160	129	118	136	0		2.14602	7.81473	11.3449	0	0
1	1716	173	111	123	136	0		5.63928	7.81473	11.3449	0	0
0	91	179	127	102	136	0		1.14473	7.81473	11.3449	0	0
0	837	174	122	112	136	0		1.06721	7.81473	11.3449	0	0
0	1732	174	127	107	136	0		0.614716	7.81473	11.3449	0	0
0	582	179	125	105	136	0		0.971534	7.81473	11.3449	0	0
0	653	181	132	96	136	0		2.50337	7.81473	11.3449	0	0
0	890	184	116	109	136	0		2.81128	7.81473	11.3449	0	0
1	1076	162	127	120	136	0		2.17469	7.81473	11.3449	0	0
0	1790	173	115	121	136	0		3.80535	7.81473	11.3449	0	0
1	2	182	128	100	137	0		1.6521	7.81473	11.3449	0	0
0	40	188	122	100	137	0		2.75995	7.81473	11.3449	0	0
1	596	171	136	103	137	0		1.61499	7.81473	11.3449	0	0
0	661	183	118	109	137	0		2.23153	7.81473	11.3449	0	0
0	664	195	119	96	137	0		5.25787	7.81473	11.3449	0	0
0	1684	163	143	104	137	0		3.81205	7.81473	11.3449	0	0
0	628	177	133	101	137	0		1.46893	7.81473	11.3449	0	0
0	682	171	134	106	137	0		1.02173	7.81473	11.3449	0	0
0	103	180	125	107	137	0		0.954089	7.81473	11.3449	0	0
1	842	180	133	99	137	0		1.94645	7.81473	11.3449	0	0
1	1470	171	137	105	138	0		1.51188	7.81473	11.3449	0	0
0	1782	173	131	109	138	0		0.563581	7.81473	11.3449	0	0
0	1399	172	146	96	138	0		5.59554	7.81473	11.3449	0	0
1	1499	171	126	117	138	0		1.02494	7.81473	11.3449	0	0
1	21	181	122	112	138	0		1.38851	7.81473	11.3449	0	0
0	280	188	137	90	138	0		5.75508	7.81473	11.3449	0	0
0	774	184	135	96	138	0		3.16806	7.81473	11.3449	0	0
1	1365	167	137	112	139	0		1.30275	7.81473	11.3449	0	0
0	619	159	146	112	139	0		4.48732	7.81473	11.3449	0	0
1	663	170	130	117	139	0		0.804463	7.81473	11.3449	0	0
0	939	185	128	104	139	0		1.48651	7.81473	11.3449	0	0
0	1001	176	136	105	139	0		1.21841	7.81473	11.3449	0	0
1	1752	168	133	116	139	0		0.910637	7.81473	11.3449	0	0
1	1849	186	124	107	139	0		1.66947	7.81473	11.3449	0	0
0	224	190	129	99	139	0		2.9363	7.81473	11.3449	0	0
1	446	197	111	110	139	0		7.17179	7.81473	11.3449	0	0
0	696	195	134	89	139	0		6.95005	7.81473	11.3449	0	0
0	710	177	134	107	139	0		0.802539	7.81473	11.3449	0	0
1	859	188	128	102	139	0		2.13578	7.81473	11.3449	0	0
0	77	185	131	103	140	0		1.59917	7.81473	11.3449	0	0
0	1505	194	123	102	140	0		3.66126	7.81473	11.3449	0	0
1	1068	166	133	121	140	0		1.46496	7.81473	11.3449	0	0
1	1728	178	129	113	140	0		0.491308	7.81473	11.3449	0	0
1	225	194	108	119	140	0		8.69405	7.81473	11.3449	1	0
0	976	185	131	105	140	0		1.33448	7.81473	11.3449	0	0
0	875	181	131	110	141	0		0.59516	7.81473	11.3449	0	0
0	1228	185	140	97	141	0		3.8545	7.81473	11.3449	0	0
1	209	200	118	105	141	0		5.89786	7.81473	11.3449	0	0
0	1005	191	128	104	141	0		2.3545	7.81473	11.3449	0	0
1	1113	151	146	126	141	0		6.87898	7.81473	11.3449	0	0
1	1563	176	126	121	141	0		1.26478	7.81473	11.3449	0	0
1	1591	169	158	96	141	0		11.236	7.81473	11.3449	1	0
0	1639	185	143	95	141	0		5.14239	7.81473	11.3449	0	0
1	1820	169	121	133	141	0		5.28456	7.81473	11.3449	0	0
0	51	190	128	106	141	0		1.95664	7.81473	11.3449	0	0
0	251	194	123	107	141	0		3.19445	7.81473	11.3449	0	0
1	874	183	126	115	141	0		1.02703	7.81473	11.3449	0	0
0	987	192	122	110	141	0		2.84052	7.81473	11.3449	0	0
1	1280	179	144	101	141	0		3.44654	7.81473	11.3449	0	0
0	1283	189	131	104	141	0		1.95004	7.81473	11.3449	0	0
0	1507	194	127	103	141	0		3.12728	7.81473	11.3449	0	0
1	861	173	146	106	142	0		3.111	7.81473	11.3449	0	0
0	1069	166	137	122	142	0		1.60044	7.81473	11.3449	0	0
0	1139	172	131	122	142	0		0.984227	7.81473	11.3449	0	0
0	1446	178	128	120	142	0		0.86395	7.81473	11.3449	0	0
0	338	190	138	99	142	0		3.54696	7.81473	11.3449	0	0
0	470	204	146	77	142	0		18.0139	7.81473	11.3449	1	1
0	1337	206	133	88	142	0		10.3972	7.81473	11.3449	1	0
0	1730	175	137	115	142	0		0.5074	7.81473	11.3449	0	0
0	1734	188	120	119	142	0		3.03439	7.81473	11.3449	0	0
1	1108	158	147	123	143	0		4.67802	7.81473	11.3449	0	0
1	1475	168	144	116	143	0		2.01171	7.81473	11.3449	0	0
0	1645	176	134	118	143	0		0.377058	7.81473	11.3449	0	0
0	724	195	105	129	143	0		12.9409	7.81473	11.3449	1	1
0	1078	166	143	120	143	0		2.07342	7.81473	11.3449	0	0
0	1633	193	137	99	143	0		3.88517	7.81473	11.3449	0	0
1	308	195	136	99	143	0		4.15194	7.81473	11.3449	0	0
1	1699	184	120	126	143	0		3.64164	7.81473	11.3449	0	0
0	1719	181	137	112	143	0		0.560805	7.81473	11.3449	0	0
0	1741	177	130	123	143	0		0.901012	7.81473	11.3449	0	0
0	882	193	140	98	144	0		4.55464	7.81473	11.3449	0	0
0	1098	164	144	123	144	0		2.65464	7.81473	11.3449	0	0
0	1224	197	138	96	144	0		5.61862	7.81473	11.3449	0	0
0	1121	168	134	130	144	0		2.28838	7.81473	11.3449	0	0
1	1386	183	141	108	144	0		1.47624	7.81473	11.3449	0	0
0	1406	195	125	112	144	0		2.79114	7.81473	11.3449	0	0
1	1783	172	136	124	144	0		0.925954	7.81473	11.3449	0	0
0	1839	194	131	107	144	0		2.32734	7.81473	11.3449	0	0
0	379	191	137	105	144	0		2.2359	7.81473	11.3449	0	0
1	1542	168	127	138	144	0		5.31494	7.81473	11.3449	0	0
1	1753	178	130	125	144	0		1.08371	7.81473	11.3449	0	0
0	760	182	145	107	145	0		2.32483	7.81473	11.3449	0	0
1	1104	168	147	119	145	0		2.42087	7.81473	11.3449	0	0
0	1524	185	139	110	145	0		1.035	7.81473	11.3449	0	0
0	1536	185	112	137	145	0		10.0976	7.81473	11.3449	1	0
0	1232	184	142	109	145	0		1.47371	7.81473	11.3449	0	0
0	1599	182	127	126	145	0		1.70954	7.81473	11.3449	0	0
0	1662	189	142	104	145	0		2.77826	7.81473	11.3449	0	0
0	889	194	123	119	145	0		3.1207	7.81473	11.3449	0	0
1	1085	175	134	127	145	0		1.02989	7.81473	11.3449	0	0
1	1120	166	139	131	145	0		2.59623	7.81473	11.3449	0	0
0	1273	199	137	100	145	0		4.79013	7.81473	11.3449	0	0
0	1690	182	132	122	145	0		0.546365	7.81473	11.3449	0	0
0	259	185	147	105	146	0		3.27112	7.81473	11.3449	0	0
0	969	188	149	100	146	0		5.3934	7.81473	11.3449	0	0
1	1080	165	139	133	146	0		3.11952	7.81473	11.3449	0	0
1	1515	187	130	120	146	0		0.905627	7.81473	11.3449	0	0
1	1676	186	138	114	146	0		0.577548	7.81473	11.3449	0	0
0	118	215	119	105	146	0		11.0999	7.81473	11.3449	1	0
0	193	208	124	107	146	0		6.86256	7.81473	11.3449	0	0
0	1117	168	133	138	146	0		4.11252	7.81473	11.3449	0	0
1	1678	179	135	125	146	0		0.519745	7.81473	11.3449	0	0
1	1695	171	126	142	146	0		6.46129	7.81473	11.3449	0	0
1	1838	191	129	119	146	0		1.40936	7.81473	11.3449	0	0
0	260	203	123	114	147	0		5.04694	7.81473	11.3449	0	0
1	1225	178	149	113	147	0		2.23892	7.81473	11.3449	0	0
1	33	193	138	110	147	0		1.67634	7.81473	11.3449	0	0
0	150	195	139	107	147	0		2.53226	7.81473	11.3449	0	0
1	1046	189	142	110	147	0		1.55422	7.81473	11.3449	0	0
0	1421	190	140	111	147	0		1.30016	7.81473	11.3449	0	0
0	1756	174	131	136	147	0		3.10844	7.81473	11.3449	0	0
0	1840	202	130	109	147	0		3.85364	7.81473	11.3449	0	0
0	887	189	136	117	147	0		0.553961	7.81473	11.3449	0	0
0	993	180	149	113	147	0		2.11339	7.81473	11.3449	0	0
1	351	201	143	99	148	0		6.21236	7.81473	11.3449	0	0
0	615	189	142	112	148	0		1.2283	7.81473	11.3449	0	0
1	715	185	135	123	148	0		0.355127	7.81473	11.3449	0	0
0	1045	201	112	130	148	0		10.6031	7.81473	11.3449	1	0
0	1712	177	140	126	148	0		0.531332	7.81473	11.3449	0	0
1	1774	182	140	121	148	0		0.191027	7.81473	11.3449	0	0
1	146	202	126	116	148	0		3.99564	7.81473	11.3449	0	0
0	199	180	150	114	148	0		2.17262	7.81473	11.3449	0	0
0	378	196	141	107	148	0		2.82962	7.81473	11.3449	0	0
0	729	187	137	120	148	0		0.286774	7.81473	11.3449	0	0
1	899	199	127	118	148	0		3.06894	7.81473	11.3449	0	0
0	1070	166	157	121	148	0		5.36667	7.81473	11.3449	0	0
1	1115	159	150	135	148	0		5.79735	7.81473	11.3449	0	0
1	1356	186	132	126	148	0		0.904863	7.81473	11.3449	0	0
0	1671	176	133	135	148	0		2.32346	7.81473	11.3449	0	0
0	88	194	140	111	148	0		1.72052	7.81473	11.3449	0	0
1	464	199	131	115	148	0		2.46322	7.81473	11.3449	0	0
1	948	186	131	128	148	0		1.26669	7.81473	11.3449	0	0
1	1813	185	131	129	148	0		1.35956	7.81473	11.3449	0	0
1	465	197	132	117	149	0		1.85128	7.81473	11.3449	0	0
0	864	184	151	111	149	0		2.83077	7.81473	11.3449	0	0
0	896	195	128	123	149	0		2.26876	7.81473	11.3449	0	0
0	913	199	142	105	149	0		3.90256	7.81473	11.3449	0	0
0	924	193	147	106	149	0		3.53106	7.81473	11.3449	0	0
0	1082	173	145	128	149	0		1.2891	7.81473	11.3449	0	0
0	1105	174	145	127	149	0		1.10816	7.81473	11.3449	0	0
0	1623	181	134	131	149	0		1.16254	7.81473	11.3449	0	0
1	1798	178	131	137	149	0		2.9744	7.81473	11.3449	0	0
0	329	192	128	127	149	0		2.20922	7.81473	11.3449	0	0
1	421	202	139	106	149	0		4.04814	7.81473	11.3449	0	0
0	620	175	141	131	149	0		1.10179	7.81473	11.3449	0	0
1	1727	183	130	134	149	0		2.35244	7.81473	11.3449	0	0
0	158	199	144	105	149	0		4.13667	7.81473	11.3449	0	0
1	454	200	128	120	149	0		3.05023	7.81473	11.3449	0	0
1	475	195	135	118	149	0		1.17795	7.81473	11.3449	0	0
0	564	174	153	121	149	0		2.60436	7.81473	11.3449	0	0
1	590	187	138	123	149	0		0.20788	7.81473	11.3449	0	0
1	1010	185	133	130	149	0		1.1249	7.81473	11.3449	0	0
0	1136	165	151	132	149	0		3.89411	7.81473	11.3449	0	0
0	1806	181	133	134	149	0		1.78603	7.81473	11.3449	0	0
0	1811	186	135	127	149	0		0.570419	7.81473	11.3449	0	0
0	333	194	134	121	150	0		1.05535	7.81473	11.3449	0	0
1	867	191	133	125	150	0		0.967086	7.81473	11.3449	0	0
0	977	193	128	128	150	0		2.42305	7.81473	11.3449	0	0
1	1125	177	141	131	150	0		0.868062	7.81473	11.3449	0	0
1	1268	191	142	116	150	0		0.820631	7.81473	11.3449	0	0
0	1405	191	155	103	150	0		6.4529	7.81473	11.3449	0	0
0	1772	183	128	138	150	0		3.75826	7.81473	11.3449	0	0
1	466	198	139	113	150	0		1.94929	7.81473	11.3449	0	0
1	1212	189	137	124	150	0		0.348431	7.81473	11.3449	0	0
0	1810	185	128	137	150	0		3.50523	7.81473	11.3449	0	0
1	1823	178	138	134	150	0		1.29968	7.81473	11.3449	0	0
0	382	201	145	105	150	0		4.63166	7.81473	11.3449	0	0
1	491	191	141	120	151	0		0.419151	7.81473	11.3449	0	0
0	840	200	134	118	151	0		2.06609	7.81473	11.3449	0	0
0	1064	175	144	133	151	0		1.28796	7.81473	11.3449	0	0
0	1378	199	143	110	151	0		2.80696	7.81473	11.3449	0	0
0	1634	191	144	117	151	0		0.818327	7.81473	11.3449	0	0
1	1763	190	122	140	151	0		6.64448	7.81473	11.3449	0	0
1	1802	185	138	129	151	0		0.395247	7.81473	11.3449	0	0
1	1814	190	137	125	151	0		0.411573	7.81473	11.3449	0	0
1	30	199	135	119	151	0		1.71399	7.81473	11.3449	0	0
1	278	192	146	115	151	0		1.34905	7.81473	11.3449	0	0
1	750	196	124	133	151	0		4.79053	7.81473	11.3449	0	0
1	952	206	130	117	151	0		4.09686	7.81473	11.3449	0	0
0	1486	192	146	115	151	0		1.34905	7.81473	11.3449	0	0
0	544	198	139	117	151	0		1.43558	7.81473	11.3449	0	0
0	894	191	145	118	151	0		0.768235	7.81473	11.3449	0	0
0	1027	187	140	127	151	0		0.156343	7.81473	11.3449	0	0
1	1481	194	143	117	151	0		0.983638	7.81473	11.3449	0	0
0	723	193	135	127	152	0		0.915038	7.81473	11.3449	0	0
0	937	201	127	127	152	0		3.81177	7.81473	11.3449	0	0
0	1088	175	139	141	152	0		2.8178	7.81473	11.3449	0	0
1	455	186	140	130	152	0		0.286133	7.81473	11.3449	0	0
1	537	180	150	126	152	0		0.918997	7.81473	11.3449	0	0
0	720	193	120	143	152	0		8.74322	7.81473	11.3449	1	0
1	1182	185	149	122	152	0		0.710791	7.81473	11.3449	0	0
1	1242	193	145	118	152	0		0.886459	7.81473	11.3449	0	0
0	1737	183	144	129	152	0		0.229992	7.81473	11.3449	0	0
0	784	190	132	135	152	0		2.1423	7.81473	11.3449	0	0
1	1073	175	142	140	152	0		2.31922	7.81473	11.3449	0	0
0	1091	181	138	138	152	0		1.66868	7.81473	11.3449	0	0
1	1181	183	159	115	152	0		4.31944	7.81473	11.3449	0	0
1	196	189	163	106	153	0		8.43039	7.81473	11.3449	1	0
0	559	189	159	110	153	0		5.45271	7.81473	11.3449	0	0
1	991	187	147	124	153	0		0.297416	7.81473	11.3449	0	0
0	1795	180	145	133	153	0		0.669887	7.81473	11.3449	0	0
0	285	196	142	121	153	0		0.737025	7.81473	11.3449	0	0
1	413	202	137	120	153	0		1.95085	7.81473	11.3449	0	0
0	1179	208	140	111	153	0		4.3672	7.81473	11.3449	0	0
0	1458	182	147	130	153	0		0.406731	7.81473	11.3449	0	0
0	1553	186	149	124	153	0		0.505753	7.81473	11.3449	0	0
0	593	186	152	122	153	0		1.11508	7.81473	11.3449	0	0
0	778	197	151	112	153	0		3.12569	7.81473	11.3449	0	0
0	1417	195	150	115	153	0		2.09108	7.81473	11.3449	0	0
1	12	187	150	124	154	0		0.586098	7.81473	11.3449	0	0
0	370	209	148	104	154	0		7.14666	7.81473	11.3449	0	0
1	392	196	126	139	154	0		5.27137	7.81473	11.3449	0	0
0	439	203	150	108	154	0		4.88305	7.81473	11.3449	0	0
0	188	198	147	117	154	0		1.63247	7.81473	11.3449	0	0
1	460	190	149	123	154	0		0.534971	7.81473	11.3449	0	0
0	563	180	166	116	154	0		7.12668	7.81473	11.3449	0	0
0	960	196	154	112	154	0		3.66417	7.81473	11.3449	0	0
1	1376	174	159	129	154	0		3.47962	7.81473	11.3449	0	0
0	1642	193	147	122	154	0		0.551952	7.81473	11.3449	0	0
1	90	199	127	137	154	0		4.84128	7.81473	11.3449	0	0
1	130	206	133	124	154	0		3.20968	7.81473	11.3449	0	0
0	290	202	157	104	154	0		7.85288	7.81473	11.3449	1	0
1	371	207	130	126	154	0		4.18262	7.81473	11.3449	0	0
0	855	197	141	125	154	0		0.629794	7.81473	11.3449	0	0
1	1066	172	151	140	154	0		2.88479	7.81473	11.3449	0	0
0	1744	180	145	138	154	0		1.14455	7.81473	11.3449	0	0
0	1778	197	129	137	154	0		3.88317	7.81473	11.3449	0	0
1	321	201	145	118	155	0		1.73251	7.81473	11.3449	0	0
0	384	202	150	112	155	0		3.58523	7.81473	11.3449	0	0
0	448	204	136	124	155	0		2.23994	7.81473	11.3449	0	0
1	550	180	156	128	155	0		1.8133	7.81473	11.3449	0	0
1	1062	202	127	135	155	0		4.9599	7.81473	11.3449	0	0
0	1106	181	150	133	155	0		0.748602	7.81473	11.3449	0	0
1	1118	177	153	134	155	0		1.64386	7.81473	11.3449	0	0
1	1431	172	165	127	155	0		6.05102	7.81473	11.3449	0	0
0	1480	187	158	119	155	0		2.87995	7.81473	11.3449	0	0
1	17	192	157	116	155	0		3.19287	7.81473	11.3449	0	0
0	23	206	149	110	155	0		4.69442	7.81473	11.3449	0	0
1	1552	181	135	149	155	0		4.95768	7.81473	11.3449	0	0
1	1819	185	139	141	155	0		1.76931	7.81473	11.3449	0	0
0	617	199	141	126	155	0		0.80726	7.81473	11.3449	0	0
1	1075	183	148	135	155	0		0.526893	7.81473	11.3449	0	0
0	949	199	147	121	156	0		1.12532	7.81473	11.3449	0	0
1	1071	184	141	142	156	0		1.70598	7.81473	11.3449	0	0
1	1109	173	153	141	156	0		2.92499	7.81473	11.3449	0	0
0	1122	179	151	137	156	0		1.26782	7.81473	11.3449	0	0
1	1456	187	152	128	156	0		0.519089	7.81473	11.3449	0	0
1	1567	188	147	132	156	0		0.0814287	7.81473	11.3449	0	0
1	328	201	159	108	156	0		6.80698	7.81473	11.3449	0	0
1	908	199	144	125	156	0		0.692677	7.81473	11.3449	0	0
1	921	191	158	119	156	0		2.76115	7.81473	11.3449	0	0
0	1072	167	156	145	156	0		5.397	7.81473	11.3449	0	0
0	1144	175	154	139	156	0		2.39295	7.81473	11.3449	0	0
0	228	190	145	134	156	0		0.136223	7.81473	11.3449	0	0
0	1017	207	136	126	156	0		2.78825	7.81473	11.3449	0	0
0	1041	189	154	126	156	0		0.864254	7.81473	11.3449	0	0
1	1042	187	146	136	156	0		0.308487	7.81473	11.3449	0	0
1	1056	181	153	135	156	0		1.0521	7.81473	11.3449	0	0
0	1061	181	149	139	156	0		1.07023	7.81473	11.3449	0	0
0	1558	198	149	122	156	0		1.01145	7.81473	11.3449	0	0
0	78	201	146	123	157	0		1.07828	7.81473	11.3449	0	0
1	484	196	153	121	157	0		1.4656	7.81473	11.3449	0	0
1	968	193	154	123	157	0		1.20004	7.81473	11.3449	0	0
0	1039	182	173	115	157	0		10.617	7.81473	11.3449	1	0
1	1103	179	148	143	157	0		1.86638	7.81473	11.3449	0	0
0	1137	178	157	135	157	0		2.06942	7.81473	11.3449	0	0
0	1328	203	134	133	157	0		2.69407	7.81473	11.3449	0	0
1	1346	188	158	124	157	0		1.93146	7.81473	11.3449	0	0
0	1700	189	152	129	157	0		0.368463	7.81473	11.3449	0	0
1	60	208	130	133	157	0		4.83733	7.81473	11.3449	0	0
0	202	198	153	120	157	0		1.77097	7.81473	11.3449	0	0
0	366	202	140	129	157	0		1.22973	7.81473	11.3449	0	0
0	933	188	146	137	157	0		0.329571	7.81473	11.3449	0	0
1	1565	197	141	133	157	0		0.649744	7.81473	11.3449	0	0
0	1733	181	157	133	157	0		1.60531	7.81473	11.3449	0	0
1	1824	177	164	130	157	0		4.22744	7.81473	11.3449	0	0
0	275	198	143	131	157	0		0.461192	7.81473	11.3449	0	0
0	497	197	164	111	157	0		7.11643	7.81473	11.3449	0	0
1	943	197	156	119	157	0		2.43212	7.81473	11.3449	0	0
0	1110	182	151	139	157	0		0.979889	7.81473	11.3449	0	0
0	1836	209	142	121	157	0		2.81799	7.81473	11.3449	0	0
1	648	195	151	127	158	0		0.411747	7.81473	11.3449	0	0
1	733	198	155	120	158	0		2.08991	7.81473	11.3449	0	0
0	863	192	156	125	158	0		1.23987	7.81473	11.3449	0	0
0	1498	193	144	136	158	0		0.311544	7.81473	11.3449	0	0
0	1529	193	171	109	158	0		10.996	7.81473	11.3449	1	0
1	1570	184	144	145	158	0		1.85253	7.81473	11.3449	0	0
0	1731	189	146	138	158	0		0.363418	7.81473	11.3449	0	0
0	96	208	136	130	158	0		2.98457	7.81473	11.3449	0	0
0	113	218	140	116	158	0		6.27636	7.81473	11.3449	0	0
1	141	214	142	118	158	0		4.52142	7.81473	11.3449	0	0
1	289	195	133	146	158	0		4.30966	7.81473	11.3449	0	0
0	441	207	145	122	158	0		2.13376	7.81473	11.3449	0	0
0	714	189	149	136	158	0		0.148573	7.81473	11.3449	0	0
1	834	202	139	133	158	0		1.45862	7.81473	11.3449	0	0
0	1044	202	137	135	158	0		1.98568	7.81473	11.3449	0	0
0	1307	189	164	121	158	0		4.15663	7.81473	11.3449	0	0
1	1584	196	144	134	158	0		0.30125	7.81473	11.3449	0	0
0	20	213	131	131	158	0		5.60072	7.81473	11.3449	0	0
1	741	188	161	126	158	0		2.34559	7.81473	11.3449	0	0
1	1128	178	154	143	158	0		2.14438	7.81473	11.3449	0	0
0	1628	192	158	125	158	0		1.61786	7.81473	11.3449	0	0
1	1724	183	153	139	158	0		0.939055	7.81473	11.3449	0	0
1	28	210	130	136	159	0		5.61284	7.81473	11.3449	0	0
0	239	209	146	121	159	0		2.65081	7.81473	11.3449	0	0
0	717	196	155	125	159	0		1.11141	7.81473	11.3449	0	0
1	1055	187	145	144	159	0		1.29019	7.81473	11.3449	0	0
1	1101	181	150	145	159	0		1.79347	7.81473	11.3449	0	0
1	1571	188	151	137	159	0		0.263958	7.81473	11.3449	0	0
1	1874	193	148	135	159	0		0.0320587	7.81473	11.3449	0	0
1	440	204	148	125	159	0		1.24166	7.81473	11.3449	0	0
0	445	196	145	136	159	0		0.289536	7.81473	11.3449	0	0
0	713	201	150	126	159	0		0.829291	7.81473	11.3449	0	0
1	788	202	147	128	159	0		0.71907	7.81473	11.3449	0	0
0	965	199	152	126	159	0		0.787067	7.81473	11.3449	0	0
0	1129	176	162	139	159	0		3.47561	7.81473	11.3449	0	0
0	1437	197	164	116	159	0		5.40543	7.81473	11.3449	0	0
1	56	208	125	145	159	0		9.06201	7.81473	11.3449	1	0
1	485	196	154	128	159	0		0.602203	7.81473	11.3449	0	0
1	1037	191	157	130	159	0		0.836258	7.81473	11.3449	0	0
1	1048	198	135	145	159	0		3.58912	7.81473	11.3449	0	0
0	1089	182	150	146	159	0		1.79074	7.81473	11.3449	0	0
0	1131	163	164	151	159	0		9.09037	7.81473	11.3449	1	0
0	1504	192	153	133	159	0		0.162946	7.81473	11.3449	0	0
0	1605	194	148	136	159	0		0.0568114	7.81473	11.3449	0	0
1	1192	197	146	136	160	0		0.241002	7.81473	11.3449	0	0
1	1240	191	147	141	160	0		0.482433	7.81473	11.3449	0	0
1	1452	188	164	127	160	0		3.00189	7.81473	11.3449	0	0
1	1780	186	161	132	160	0		1.78824	7.81473	11.3449	0	0
0	95	213	146	121	160	0		3.53763	7.81473	11.3449	0	0
1	243	201	129	150	160	0		7.45232	7.81473	11.3449	0	0
1	272	203	148	129	160	0		0.732364	7.81473	11.3449	0	0
1	520	191	152	137	160	0		0.114272	7.81473	11.3449	0	0
0	819	193	151	136	160	0		0.0203857	7.81473	11.3449	0	0
0	1086	183	158	139	160	0		1.40928	7.81473	11.3449	0	0
1	1124	179	154	147	160	0		2.44518	7.81473	11.3449	0	0
1	76	194	137	150	160	0		3.99973	7.81473	11.3449	0	0
1	236	208	150	123	160	0		2.17525	7.81473	11.3449	0	0
0	495	213	143	125	160	0		3.17499	7.81473	11.3449	0	0
1	1526	185	168	128	160	0		4.46818	7.81473	11.3449	0	0
0	1701	195	144	142	160	0		0.879309	7.81473	11.3449	0	0
1	1739	193	149	139	160	0		0.147638	7.81473	11.3449	0	0
1	1848	207	147	127	160	0		1.47831	7.81473	11.3449	0	0
0	5	191	171	120	161	0		6.99845	7.81473	11.3449	0	0
1	326	206	149	127	161	0		1.28522	7.81473	11.3449	0	0
0	363	208	148	126	161	0		1.72448	7.81473	11.3449	0	0
1	400	214	147	121	161	0		3.75493	7.81473	11.3449	0	0
1	428	209	148	125	161	0		2.02785	7.81473	11.3449	0	0
0	462	203	154	125	161	0		1.43429	7.81473	11.3449	0	0
0	673	202	146	134	161	0		0.54383	7.81473	11.3449	0	0
1	963	196	151	135	161	0		0.0119771	7.81473	11.3449	0	0
0	1588	193	165	124	161	0		3.57168	7.81473	11.3449	0	0
1	1800	202	144	136	161	0		0.792083	7.81473	11.3449	0	0
1	297	198	143	142	161	0		1.12001	7.81473	11.3449	0	0
0	322	204	155	124	161	0		1.81747	7.81473	11.3449	0	0
0	403	202	162	119	161	0		4.15067	7.81473	11.3449	0	0
0	1119	180	158	145	161	0		2.25327	7.81473	11.3449	0	0
0	1692	183	150	150	161	0		2.33393	7.81473	11.3449	0	0
1	1826	208	146	129	161	0		1.52077	7.81473	11.3449	0	0
0	279	203	150	131	161	0		0.556492	7.81473	11.3449	0	0
0	394	200	157	127	161	0		1.24257	7.81473	11.3449	0	0
1	560	195	154	135	161	0		0.0945994	7.81473	11.3449	0	0
0	1087	182	155	147	161	0		1.90387	7.81473	11.3449	0	0
0	1653	204	158	122	161	0		2.66837	7.81473	11.3449	0	0
1	1847	204	148	132	161	0		0.660422	7.81473	11.3449	0	0
0	1851	214	148	122	161	0		3.55268	7.81473	11.3449	0	0
1	339	204	149	132	162	0		0.616997	7.81473	11.3449	0	0
1	622	197	145	143	162	0		0.874798	7.81473	11.3449	0	0
0	671	183	142	160	162	0		6.48088	7.81473	11.3449	0	0
0	1081	182	157	146	162	0		1.88199	7.81473	11.3449	0	0
1	814	200	146	140	162	0		0.579635	7.81473	11.3449	0	0
1	1100	181	158	147	162	0		2.24416	7.81473	11.3449	0	0
0	1426	207	148	131	162	0		1.09496	7.81473	11.3449	0	0
0	1694	205	132	149	162	0		6.32645	7.81473	11.3449	0	0
1	296	190	162	135	162	0		1.31718	7.81473	11.3449	0	0
1	488	192	158	137	162	0		0.452216	7.81473	11.3449	0	0
1	665	197	150	140	162	0		0.121665	7.81473	11.3449	0	0
0	695	197	153	137	162	0		0.0112334	7.81473	11.3449	0	0
0	846	193	149	145	162	0		0.657421	7.81473	11.3449	0	0
0	1126	183	167	137	162	0		3.30124	7.81473	11.3449	0	0
1	1133	181	158	148	162	0		2.35388	7.81473	11.3449	0	0
1	1151	201	147	139	162	0		0.466707	7.81473	11.3449	0	0
0	1581	199	152	136	162	0		0.0610511	7.81473	11.3449	0	0
1	1677	194	152	141	162	0		0.124495	7.81473	11.3449	0	0
0	457	197	155	136	163	0		0.0981251	7.81473	11.3449	0	0
1	545	204	152	132	163	0		0.573489	7.81473	11.3449	0	0
0	1815	202	148	138	163	0		0.401969	7.81473	11.3449	0	0
1	163	207	136	146	163	0		4.3991	7.81473	11.3449	0	0
0	307	210	158	121	163	0		3.6923	7.81473	11.3449	0	0
1	453	208	150	131	163	0		1.14946	7.81473	11.3449	0	0
1	458	195	147	147	163	0		1.09563	7.81473	11.3449	0	0
1	1077	180	158	151	163	0		2.96282	7.81473	11.3449	0	0
0	1112	185	159	145	163	0		1.43797	7.81473	11.3449	0	0
0	1134	189	161	139	163	0		1.02971	7.81473	11.3449	0	0
0	1492	180	169	140	163	0		4.30821	7.81473	11.3449	0	0
1	1746	188	150	151	163	0		1.8509	7.81473	11.3449	0	0
0	1762	205	137	147	163	0		3.98398	7.81473	11.3449	0	0
1	208	213	139	138	163	0		3.58125	7.81473	11.3449	0	0
0	435	217	158	115	163	0		6.93171	7.81473	11.3449	0	0
1	459	201	143	146	163	0		1.7944	7.81473	11.3449	0	0
0	461	197	152	141	163	0		0.0715049	7.81473	11.3449	0	0
1	833	184	156	150	163	0		1.97055	7.81473	11.3449	0	0
0	871	211	151	128	163	0		1.9425	7.81473	11.3449	0	0
0	967	208	148	134	163	0		1.0741	7.81473	11.3449	0	0
1	1141	182	162	146	163	0		2.38102	7.81473	11.3449	0	0
0	1688	208	152	130	163	0		1.22419	7.81473	11.3449	0	0
1	160	211	154	126	164	0		2.33138	7.81473	11.3449	0	0
1	207	220	138	133	164	0		5.53521	7.81473	11.3449	0	0
0	256	214	149	128	164	0		2.57888	7.81473	11.3449	0	0
1	336	212	149	130	164	0		1.94588	7.81473	11.3449	0	0
0	498	203	165	123	164	0		3.90259	7.81473	11.3449	0	0
0	1063	204	141	146	164	0		2.50622	7.81473	11.3449	0	0
0	1130	177	161	153	164	0		4.20872	7.81473	11.3449	0	0
0	1147	183	159	149	164	0		2.13574	7.81473	11.3449	0	0
1	1299	199	151	141	164	0		0.133428	7.81473	11.3449	0	0
0	1372	197	168	126	164	0		3.90897	7.81473	11.3449	0	0
0	1576	189	182	120	164	0		12.9315	7.81473	11.3449	1	1
1	1664	191	153	147	164	0		0.740784	7.81473	11.3449	0	0
1	917	201	158	133	164	0		0.608876	7.81473	11.3449	0	0
1	942	203	152	137	164	0		0.234084	7.81473	11.3449	0	0
0	1114	176	170	146	164	0		5.54038	7.81473	11.3449	0	0
0	1161	193	161	138	164	0		0.707265	7.81473	11.3449	0	0
1	1544	200	158	134	164	0		0.480291	7.81473	11.3449	0	0
1	1803	200	151	141	164	0		0.157497	7.81473	11.3449	0	0
1	1844	208	152	132	164	0		1.01754	7.81473	11.3449	0	0
1	478	202	158	133	164	0		0.647997	7.81473	11.3449	0	0
0	701	197	149	147	164	0		0.791195	7.81473	11.3449	0	0
0	1040	196	163	134	164	0		1.21456	7.81473	11.3449	0	0
0	1140	186	158	149	164	0		1.55677	7.81473	11.3449	0	0
1	24	214	157	123	165	0		3.76007	7.81473	11.3449	0	0
1	1002	209	154	131	165	0		1.26876	7.81473	11.3449	0	0
1	1379	183	163	148	165	0		2.43442	7.81473	11.3449	0	0
1	1587	201	154	139	165	0		0.0624148	7.81473	11.3449	0	0
1	1735	193	149	152	165	0		1.71903	7.81473	11.3449	0	0
1	116	220	144	131	165	0		4.29039	7.81473	11.3449	0	0
1	853	193	170	132	165	0		3.4686	7.81473	11.3449	0	0
0	856	206	146	143	165	0		1.25194	7.81473	11.3449	0	0
1	966	209	153	133	165	0		1.04479	7.81473	11.3449	0	0
0	1318	208	138	149	165	0		4.40313	7.81473	11.3449	0	0
0	74	209	152	135	165	0		0.908618	7.81473	11.3449	0	0
1	1350	192	168	136	165	0		2.36267	7.81473	11.3449	0	0
0	1720	201	147	148	165	0		1.26942	7.81473	11.3449	0	0
1	1736	199	137	160	165	0		7.08301	7.81473	11.3449	0	0
1	404	200	163	134	166	0		1.13846	7.81473	11.3449	0	0
1	419	211	141	145	166	0		3.26278	7.81473	11.3449	0	0
0	444	201	156	140	166	0		0.0525566	7.81473	11.3449	0	0
1	450	207	152	138	166	0		0.539331	7.81473	11.3449	0	0
1	813	202	157	138	166	0		0.175369	7.81473	11.3449	0	0
1	1035	195	161	141	166	0		0.451808	7.81473	11.3449	0	0
0	1742	203	158	136	166	0		0.400124	7.81473	11.3449	0	0
0	1768	203	149	145	166	0		0.709959	7.81473	11.3449	0	0
1	474	212	153	133	166	0		1.48028	7.81473	11.3449	0	0
0	508	205	160	133	166	0		1.0132	7.81473	11.3449	0	0
0	650	205	157	136	166	0		0.454505	7.81473	11.3449	0	0
1	885	201	141	156	166	0		4.41453	7.81473	11.3449	0	0
1	1079	187	163	148	166	0		1.68205	7.81473	11.3449	0	0
1	1102	186	157	155	166	0		2.40912	7.81473	11.3449	0	0
1	1646	197	165	136	166	0		1.31321	7.81473	11.3449	0	0
0	1817	184	152	162	166	0		4.87542	7.81473	11.3449	0	0
1	270	218	143	138	166	0		3.71551	7.81473	11.3449	0	0
0	306	211	147	141	166	0		1.59698	7.81473	11.3449	0	0
0	372	208	148	143	166	0		1.12738	7.81473	11.3449	0	0
0	918	204	161	134	166	0		0.940297	7.81473	11.3449	0	0
1	1094	191	154	154	166	0		1.67654	7.81473	11.3449	0	0
0	1297	202	157	140	166	0		0.0931394	7.81473	11.3449	0	0
0	1619	204	159	136	166	0		0.516564	7.81473	11.3449	0	0
1	1725	206	153	140	166	0		0.356329	7.81473	11.3449	0	0
0	1818	182	158	159	166	0		4.00174	7.81473	11.3449	0	0
1	214	216	144	140	167	0		3.06462	7.81473	11.3449	0	0
0	477	206	163	131	167	0		1.81386	7.81473	11.3449	0	0
1	490	208	158	134	167	0		0.952525	7.81473	11.3449	0	0
1	526	203	155	142	167	0		0.0966286	7.81473	11.3449	0	0
0	649	208	155	137	167	0		0.593057	7.81473	11.3449	0	0
1	659	201	156	143	167	0		0.0406236	7.81473	11.3449	0	0
0	972	212	162	126	167	0		3.36182	7.81473	11.3449	0	0
0	1149	185	165	150	167	0		2.42045	7.81473	11.3449	0	0
1	1351	188	168	144	167	0		2.2781	7.81473	11.3449	0	0
0	1429	198	166	136	167	0		1.47049	7.81473	11.3449	0	0
1	350	206	160	135	167	0		0.820221	7.81473	11.3449	0	0
0	391	210	154	137	167	0		0.833935	7.81473	11.3449	0	0
1	678	207	152	142	167	0		0.509079	7.81473	11.3449	0	0
1	1332	196	161	144	167	0		0.343373	7.81473	11.3449	0	0
0	1539	206	157	138	167	0		0.374535	7.81473	11.3449	0	0
0	1797	188	166	147	167	0		1.88445	7.81473	11.3449	0	0
1	44	216	147	139	167	0		2.45453	7.81473	11.3449	0	0
1	302	201	172	129	167	0		4.37746	7.81473	11.3449	0	0
1	362	211	160	131	167	0		1.89451	7.81473	11.3449	0	0
0	632	198	154	150	167	0		0.594554	7.81473	11.3449	0	0
0	704	203	158	141	167	0		0.111471	7.81473	11.3449	0	0
0	838	207	161	134	167	0		1.11962	7.81473	11.3449	0	0
1	883	205	146	151	167	0		2.11281	7.81473	11.3449	0	0
1	947	196	164	142	167	0		0.708072	7.81473	11.3449	0	0
1	1292	207	148	147	167	0		1.32637	7.81473	11.3449	0	0
1	1381	200	163	139	167	0		0.596607	7.81473	11.3449	0	0
1	1443	190	171	141	167	0		2.86712	7.81473	11.3449	0	0
0	1773	190	161	151	167	0		1.27266	7.81473	11.3449	0	0
0	37	211	146	146	168	0		2.08852	7.81473	11.3449	0	0
1	1013	201	160	142	168	0		0.140298	7.81473	11.3449	0	0
0	1083	191	168	144	168	0		1.81448	7.81473	11.3449	0	0
1	1183	196	163	144	168	0		0.52392	7.81473	11.3449	0	0
0	1755	203	153	147	168	0		0.397972	7.81473	11.3449	0	0
1	315	213	147	144	168	0		2.02757	7.81473	11.3449	0	0
1	395	214	125	165	168	0		17.265	7.81473	11.3449	1	1
0	574	208	169	127	168	0		4.20881	7.81473	11.3449	0	0
1	603	205	147	152	168	0		2.0403	7.81473	11.3449	0	0
1	1099	185	162	157	168	0		2.96148	7.81473	11.3449	0	0
1	1146	190	163	151	168	0		1.39319	7.81473	11.3449	0	0
0	1367	209	165	130	168	0		2.60361	7.81473	11.3449	0	0
1	1425	208	159	137	168	0		0.678946	7.81473	11.3449	0	0
1	1577	201	154	149	168	0		0.440594	7.81473	11.3449	0	0
1	359	216	148	141	168	0		2.27515	7.81473	11.3449	0	0
1	558	193	155	157	168	0		1.909	7.81473	11.3449	0	0
1	681	199	167	139	168	0		1.26178	7.81473	11.3449	0	0
1	1059	206	136	163	168	0		8.91483	7.81473	11.3449	1	0
0	1143	191	160	154	168	0		1.43252	7.81473	11.3449	0	0
1	1217	194	162	149	168	0		0.693832	7.81473	11.3449	0	0
1	1249	199	158	148	168	0		0.205298	7.81473	11.3449	0	0
0	1511	190	175	140	168	0		4.19743	7.81473	11.3449	0	0
0	1776	197	148	160	168	0		3.49073	7.81473	11.3449	0	0
0	1830	227	153	125	168	0		6.49132	7.81473	11.3449	0	0
1	14	188	170	148	169	0		2.62604	7.81473	11.3449	0	0
0	376	221	155	130	169	0		3.69679	7.81473	11.3449	0	0
0	381	208	138	160	169	0		7.16204	7.81473	11.3449	0	0
1	449	199	170	137	169	0		2.18806	7.81473	11.3449	0	0
0	452	208	155	143	169	0		0.381904	7.81473	11.3449	0	0
1	611	203	157	146	169	0		0.101198	7.81473	11.3449	0	0
0	925	210	160	136	169	0		1.02806	7.81473	11.3449	0	0
0	1024	210	154	142	169	0		0.638546	7.81473	11.3449	0	0
1	1159	185	173	148	169	0		3.97293	7.81473	11.3449	0	0
0	1743	200	156	150	169	0		0.391314	7.81473	11.3449	0	0
1	216	196	160	151	169	0		0.571366	7.81473	11.3449	0	0
0	771	200	163	144	169	0		0.311273	7.81473	11.3449	0	0
0	893	206	166	135	169	0		1.61953	7.81473	11.3449	0	0
1	327	218	159	131	169	0		2.94135	7.81473	11.3449	0	0
0	405	209	152	147	169	0		0.859065	7.81473	11.3449	0	0
0	493	219	149	140	169	0		2.72773	7.81473	11.3449	0	0
1	579	193	163	152	169	0		1.04955	7.81473	11.3449	0	0
1	613	205	158	145	169	0		0.108202	7.81473	11.3449	0	0
0	975	204	144	160	169	0		4.58561	7.81473	11.3449	0	0
1	1590	193	169	146	169	0		1.65819	7.81473	11.3449	0	0
0	1687	205	152	151	169	0		0.948959	7.81473	11.3449	0	0
1	1751	205	157	146	169	0		0.146163	7.81473	11.3449	0	0
1	65	215	148	146	170	0		2.25521	7.81473	11.3449	0	0
1	89	215	152	142	170	0		1.49725	7.81473	11.3449	0	0
1	107	217	145	147	170	0		3.41336	7.81473	11.3449	0	0
0	543	213	150	146	170	0		1.56628	7.81473	11.3449	0	0
1	869	199	158	152	170	0		0.500988	7.81473	11.3449	0	0
1	100	213	150	147	170	0		1.62107	7.81473	11.3449	0	0
1	417	207	158	145	170	0		0.188477	7.81473	11.3449	0	0
1	489	198	161	151	170	0		0.428339	7.81473	11.3449	0	0
0	974	192	152	166	170	0		4.76049	7.81473	11.3449	0	0
0	997	199	152	159	170	0		2.28518	7.81473	11.3449	0	0
0	1371	202	175	133	170	0		4.34791	7.81473	11.3449	0	0
0	1424	191	161	158	170	0		1.99679	7.81473	11.3449	0	0
1	551	194	173	144	170	0		2.54497	7.81473	11.3449	0	0
0	668	219	152	140	170	0		2.29176	7.81473	11.3449	0	0
0	785	208	155	148	170	0		0.488116	7.81473	11.3449	0	0
0	851	198	171	142	170	0		1.82777	7.81473	11.3449	0	0
0	1509	199	172	140	170	0		2.24418	7.81473	11.3449	0	0
0	1632	193	148	170	170	0		7.05915	7.81473	11.3449	0	0
1	1860	212	157	142	170	0		0.693191	7.81473	11.3449	0	0
1	269	217	146	149	171	0		3.3257	7.81473	11.3449	0	0
0	283	206	157	149	171	0		0.279982	7.81473	11.3449	0	0
0	356	215	154	143	171	0		1.25659	7.81473	11.3449	0	0
0	399	218	162	132	171	0		2.95737	7.81473	11.3449	0	0
1	502	216	154	142	171	0		1.43862	7.81473	11.3449	0	0
0	945	202	165	145	171	0		0.397065	7.81473	11.3449	0	0
1	1186	193	179	140	171	0		5.14893	7.81473	11.3449	0	0
1	1196	210	161	141	171	0		0.570185	7.81473	11.3449	0	0
0	1626	218	142	152	171	0		5.1727	7.81473	11.3449	0	0
0	1675	203	172	137	171	0		2.55132	7.81473	11.3449	0	0
0	1829	219	158	135	171	0		2.42333	7.81473	11.3449	0	0
1	293	215	155	143	171	0		1.16257	7.81473	11.3449	0	0
1	487	200	163	150	171	0		0.307479	7.81473	11.3449	0	0
1	506	209	157	147	171	0		0.359988	7.81473	11.3449	0	0
1	776	211	161	141	171	0		0.652708	7.81473	11.3449	0	0
1	1028	200	159	154	171	0		0.600451	7.81473	11.3449	0	0
1	1049	221	142	150	171	0		5.53477	7.81473	11.3449	0	0
1	1312	197	169	147	171	0		1.15634	7.81473	11.3449	0	0
0	1534	213	153	147	171	0		1.13848	7.81473	11.3449	0	0
0	1738	201	159	153	171	0		0.459205	7.81473	11.3449	0	0
1	168	216	157	141	171	0		1.27415	7.81473	11.3449	0	0
1	406	213	154	147	171	0		1.00653	7.81473	11.3449	0	0
1	711	208	171	135	171	0		2.73568	7.81473	11.3449	0	0
0	888	201	165	148	171	0		0.353862	7.81473	11.3449	0	0
0	964	219	160	135	171	0		2.45925	7.81473	11.3449	0	0
1	998	220	143	151	171	0		5.08806	7.81473	11.3449	0	0
1	1127	189	168	157	171	0		2.53635	7.81473	11.3449	0	0
0	1370	212	170	132	171	0		3.44706	7.81473	11.3449	0	0
1	1715	201	161	152	171	0		0.323918	7.81473	11.3449	0	0
0	1729	199	161	154	171	0		0.590856	7.81473	11.3449	0	0
1	10	191	173	151	172	0		2.67238	7.81473	11.3449	0	0
1	300	209	155	151	172	0		0.7312	7.81473	11.3449	0	0
0	319	204	161	150	172	0		0.149145	7.81473	11.3449	0	0
0	387	201	152	162	172	0		2.88072	7.81473	11.3449	0	0
0	847	201	162	152	172	0		0.320304	7.81473	11.3449	0	0
1	857	216	151	148	172	0		1.92305	7.81473	11.3449	0	0
0	1060	218	144	153	172	0		4.62797	7.81473	11.3449	0	0
0	8	199	174	143	172	0		2.35363	7.81473	11.3449	0	0
1	120	217	160	139	172	0		1.55625	7.81473	11.3449	0	0
1	294	200	172	144	172	0		1.68059	7.81473	11.3449	0	0
0	316	203	155	158	172	0		1.44837	7.81473	11.3449	0	0
0	340	214	165	137	172	0		1.74068	7.81473	11.3449	0	0
1	666	210	168	138	172	0		1.64813	7.81473	11.3449	0	0
1	866	203	157	156	172	0		0.887206	7.81473	11.3449	0	0
0	905	213	165	138	172	0		1.47556	7.81473	11.3449	0	0
0	1051	217	160	139	172	0		1.55625	7.81473	11.3449	0	0
1	317	208	154	155	172	0		1.22774	7.81473	11.3449	0	0
1	799	205	161	151	172	0		0.179329	7.81473	11.3449	0	0
1	850	208	171	138	172	0		2.13492	7.81473	11.3449	0	0
1	1229	204	161	152	172	0		0.234946	7.81473	11.3449	0	0
0	1745	205	161	151	172	0		0.179329	7.81473	11.3449	0	0
0	468	214	154	150	173	0		1.24632	7.81473	11.3449	0	0
0	496	204	166	148	173	0		0.326126	7.81473	11.3449	0	0
0	589	210	166	142	173	0		0.826527	7.81473	11.3449	0	0
1	597	203	168	147	173	0		0.599742	7.81473	11.3449	0	0
0	698	196	174	148	173	0		2.20681	7.81473	11.3449	0	0
0	1152	199	166	153	173	0		0.635588	7.81473	11.3449	0	0
1	1168	199	181	138	173	0		5.5644	7.81473	11.3449	0	0
1	1248	214	158	146	173	0		0.739849	7.81473	11.3449	0	0
0	1698	202	145	171	173	0		7.82584	7.81473	11.3449	1	0
0	1723	199	151	168	173	0		4.90159	7.81473	11.3449	0	0
0	1792	203	164	151	173	0		0.234091	7.81473	11.3449	0	0
1	341	214	158	147	173	0		0.726655	7.81473	11.3449	0	0
1	361	214	155	150	173	0		1.10021	7.81473	11.3449	0	0
0	528	207	157	155	173	0		0.766791	7.81473	11.3449	0	0
1	829	210	167	142	173	0		0.936192	7.81473	11.3449	0	0
1	900	218	156	145	173	0		1.47154	7.81473	11.3449	0	0
1	1432	201	162	156	173	0		0.62371	7.81473	11.3449	0	0
0	1502	207	157	155	173	0		0.766791	7.81473	11.3449	0	0
0	1641	206	164	149	173	0		0.168392	7.81473	11.3449	0	0
0	1788	206	166	147	173	0		0.3368	7.81473	11.3449	0	0
0	16	228	149	143	173	0		4.95068	7.81473	11.3449	0	0
1	71	224	151	145	173	0		3.42686	7.81473	11.3449	0	0
1	133	218	152	150	173	0		2.15336	7.81473	11.3449	0	0
0	215	208	162	150	173	0		0.170045	7.81473	11.3449	0	0
1	332	222	157	141	173	0		2.35106	7.81473	11.3449	0	0
1	385	217	159	144	173	0		1.14046	7.81473	11.3449	0	0
0	386	208	166	146	173	0		0.408704	7.81473	11.3449	0	0
0	652	209	163	148	173	0		0.212098	7.81473	11.3449	0	0
0	1074	185	170	165	173	0		4.79736	7.81473	11.3449	0	0
0	1132	185	178	157	173	0		5.35526	7.81473	11.3449	0	0
1	1257	200	169	151	173	0		0.786467	7.81473	11.3449	0	0
1	1335	194	169	157	173	0		1.72323	7.81473	11.3449	0	0
0	1621	204	143	173	173	0		9.4414	7.81473	11.3449	1	0
1	1866	221	157	142	173	0		2.06793	7.81473	11.3449	0	0
0	264	218	161	142	174	0		1.38921	7.81473	11.3449	0	0
0	299	214	168	139	174	0		1.7755	7.81473	11.3449	0	0
1	492	217	155	149	174	0		1.44348	7.81473	11.3449	0	0
0	803	198	157	166	174	0		3.09149	7.81473	11.3449	0	0
1	1004	212	166	143	174	0		0.837928	7.81473	11.3449	0	0
1	1021	216	166	139	174	0		1.74711	7.81473	11.3449	0	0
0	1031	204	173	144	174	0		1.665	7.81473	11.3449	0	0
0	1084	185	176	160	174	0		5.04449	7.81473	11.3449	0	0
1	1415	205	158	158	174	0		1.00302	7.81473	11.3449	0	0
0	1510	204	183	134	174	0		7.10635	7.81473	11.3449	0	0
1	1708	204	171	146	174	0		1.06712	7.81473	11.3449	0	0
0	1837	223	159	139	174	0		2.67536	7.81473	11.3449	0	0
0	763	212	140	170	174	0		10.0235	7.81473	11.3449	1	0
0	815	215	164	143	174	0		0.967093	7.81473	11.3449	0	0
0	821	209	165	148	174	0		0.271091	7.81473	11.3449	0	0
1	1016	215	166	141	174	0		1.33744	7.81473	11.3449	0	0
0	1047	210	170	142	174	0		1.35195	7.81473	11.3449	0	0
1	1353	202	166	154	174	0		0.449177	7.81473	11.3449	0	0
1	1522	200	171	151	174	0		1.05006	7.81473	11.3449	0	0
0	1779	206	170	146	174	0		0.854199	7.81473	11.3449	0	0
0	301	213	176	134	174	0		4.57883	7.81473	11.3449	0	0
1	352	221	147	155	174	0		4.49289	7.81473	11.3449	0	0
0	402	200	177	146	174	0		2.67915	7.81473	11.3449	0	0
1	409	210	167	146	174	0		0.544841	7.81473	11.3449	0	0
0	505	214	167	142	174	0		1.20261	7.81473	11.3449	0	0
0	753	217	160	146	174	0		0.9919	7.81473	11.3449	0	0
0	919	207	159	157	174	0		0.75712	7.81473	11.3449	0	0
1	1428	207	158	158	174	0		0.994545	7.81473	11.3449	0	0
1	255	227	145	152	175	0		6.20395	7.81473	11.3449	0	0
1	355	210	152	162	175	0		2.91619	7.81473	11.3449	0	0
1	447	200	173	151	175	0		1.3715	7.81473	11.3449	0	0
1	679	206	167	151	175	0		0.292253	7.81473	11.3449	0	0
0	694	217	160	147	175	0		0.952322	7.81473	11.3449	0	0
0	115	226	159	140	175	0		3.22767	7.81473	11.3449	0	0
1	349	215	170	140	175	0		1.98186	7.81473	11.3449	0	0
1	365	218	160	147	175	0		1.08408	7.81473	11.3449	0	0
1	683	213	154	158	175	0		1.93132	7.81473	11.3449	0	0
1	830	212	162	151	175	0		0.343315	7.81473	11.3449	0	0
0	909	217	160	148	175	0		0.923005	7.81473	11.3449	0	0
1	981	204	169	152	175	0		0.504966	7.81473	11.3449	0	0
0	996	200	151	174	175	0		6.88843	7.81473	11.3449	0	0
1	1012	214	161	150	175	0		0.527222	7.81473	11.3449	0	0
1	1721	208	162	155	175	0		0.352871	7.81473	11.3449	0	0
0	1757	197	169	159	175	0		1.42925	7.81473	11.3449	0	0
0	191	221	149	156	175	0		3.99802	7.81473	11.3449	0	0
1	246	220	150	156	175	0		3.52707	7.81473	11.3449	0	0
0	414	222	161	143	175	0		1.95439	7.81473	11.3449	0	0
1	456	214	160	152	175	0		0.620239	7.81473	11.3449	0	0
0	612	215	167	144	175	0		1.04221	7.81473	11.3449	0	0
1	789	211	160	155	175	0		0.574281	7.81473	11.3449	0	0
0	1029	200	161	165	175	0		2.10787	7.81473	11.3449	0	0
0	1289	210	174	142	175	0		2.10876	7.81473	11.3449	0	0
1	1451	198	176	152	175	0		2.15984	7.81473	11.3449	0	0
1	1550	218	171	137	175	0		3.07828	7.81473	11.3449	0	0
0	155	227	159	141	176	0		3.34449	7.81473	11.3449	0	0
1	177	216	152	159	176	0		2.84345	7.81473	11.3449	0	0
0	205	210	169	148	176	0		0.576583	7.81473	11.3449	0	0
0	345	211	166	150	176	0		0.302293	7.81473	11.3449	0	0
0	353	224	159	144	176	0		2.36129	7.81473	11.3449	0	0
0	721	209	165	153	176	0		0.213164	7.81473	11.3449	0	0
1	858	206	167	154	176	0		0.301353	7.81473	11.3449	0	0
1	1174	204	167	156	176	0		0.451699	7.81473	11.3449	0	0
0	1520	209	176	142	176	0		2.5704	7.81473	11.3449	0	0
1	1566	198	168	161	176	0		1.43781	7.81473	11.3449	0	0
0	1796	200	171	156	176	0		1.0575	7.81473	11.3449	0	0
1	31	228	148	152	176	0		5.45885	7.81473	11.3449	0	0
0	226	227	158	143	176	0		3.21004	7.81473	11.3449	0	0
0	274	224	152	152	176	0		3.38492	7.81473	11.3449	0	0
0	334	213	165	150	176	0		0.372338	7.81473	11.3449	0	0
0	411	213	155	160	176	0		2.01044	7.81473	11.3449	0	0
1	438	216	163	149	176	0		0.651413	7.81473	11.3449	0	0
1	473	209	166	153	176	0		0.223994	7.81473	11.3449	0	0
0	530	213	167	148	176	0		0.535108	7.81473	11.3449	0	0
0	825	200	161	167	176	0		2.5288	7.81473	11.3449	0	0
0	1236	223	162	143	176	0		2.11391	7.81473	11.3449	0	0
1	1380	207	166	155	176	0		0.277847	7.81473	11.3449	0	0
1	1382	194	175	159	176	0		2.62767	7.81473	11.3449	0	0
1	50	223	150	156	176	0		4.07462	7.81473	11.3449	0	0
0	397	219	163	147	176	0		1.09692	7.81473	11.3449	0	0
1	716	218	163	148	176	0		0.912138	7.81473	11.3449	0	0
1	1306	201	168	160	176	0		0.985851	7.81473	11.3449	0	0
0	1514	202	168	159	176	0		0.8082	7.81473	11.3449	0	0
1	15	211	177	142	177	0		2.83667	7.81473	11.3449	0	0
0	151	217	171	142	177	0		1.95999	7.81473	11.3449	0	0
1	281	203	156	171	177	0		4.22824	7.81473	11.3449	0	0
0	407	217	151	162	177	0		3.7658	7.81473	11.3449	0	0
1	480	208	169	153	177	0		0.35568	7.81473	11.3449	0	0
1	482	212	164	154	177	0		0.318758	7.81473	11.3449	0	0
1	642	215	157	158	177	0		1.50551	7.81473	11.3449	0	0
0	1546	218	159	153	177	0		1.1573	7.81473	11.3449	0	0
0	48	213	169	149	177	0		0.596413	7.81473	11.3449	0	0
1	52	220	162	149	177	0		1.16566	7.81473	11.3449	0	0
0	472	221	159	151	177	0		1.53781	7.81473	11.3449	0	0
0	479	211	180	140	177	0		4.14696	7.81473	11.3449	0	0
1	684	205	168	158	177	0		0.522846	7.81473	11.3449	0	0
1	818	221	160	150	177	0		1.43721	7.81473	11.3449	0	0
1	843	214	160	157	177	0		0.883984	7.81473	11.3449	0	0
1	980	216	160	155	177	0		0.909963	7.81473	11.3449	0	0
0	213	215	168	149	177	0		0.64148	7.81473	11.3449	0	0
1	827	217	152	163	177	0		3.65537	7.81473	11.3449	0	0
0	828	209	166	157	177	0		0.33006	7.81473	11.3449	0	0
0	935	212	160	160	177	0		1.07455	7.81473	11.3449	0	0
0	1032	212	168	152	177	0		0.346495	7.81473	11.3449	0	0
0	1038	211	183	138	177	0		5.72531	7.81473	11.3449	0	0
1	1195	207	169	156	177	0		0.38943	7.81473	11.3449	0	0
0	1211	217	175	140	177	0		3.08517	7.81473	11.3449	0	0
1	1271	211	168	153	177	0		0.301	7.81473	11.3449	0	0
1	1545	202	164	166	177	0		1.8106	7.81473	11.3449	0	0
0	1579	199	176	157	177	0		1.90064	7.81473	11.3449	0	0
0	1651	201	161	170	177	0		3.12739	7.81473	11.3449	0	0
1	240	224	165	144	178	0		2.16098	7.81473	11.3449	0	0
1	311	214	165	154	178	0		0.381413	7.81473	11.3449	0	0
1	752	219	163	151	178	0		0.917051	7.81473	11.3449	0	0
1	787	217	160	156	178	0		1.05786	7.81473	11.3449	0	0
0	795	204	175	154	178	0		1.2157	7.81473	11.3449	0	0
1	844	202	165	166	178	0		1.73295	7.81473	11.3449	0	0
1	915	203	171	159	178	0		0.863962	7.81473	11.3449	0	0
0	1145	186	184	163	178	0		6.96673	7.81473	11.3449	0	0
1	1157	205	168	160	178	0		0.652987	7.81473	11.3449	0	0
1	1329	210	161	162	178	0		1.14872	7.81473	11.3449	0	0
1	1358	207	173	153	178	0		0.774239	7.81473	11.3449	0	0
0	1530	211	176	146	178	0		1.89121	7.81473	11.3449	0	0
0	1711	199	182	152	178	0		3.57639	7.81473	11.3449	0	0
0	1825	231	165	137	178	0		4.97849	7.81473	11.3449	0	0
1	159	220	165	149	178	0		1.0625	7.81473	11.3449	0	0
0	211	223	155	156	178	0		2.75855	7.81473	11.3449	0	0
1	241	224	152	158	178	0		3.91483	7.81473	11.3449	0	0
0	242	222	158	154	178	0		1.8925	7.81473	11.3449	0	0
1	389	221	161	152	178	0		1.31669	7.81473	11.3449	0	0
0	577	221	163	150	178	0		1.20981	7.81473	11.3449	0	0
0	722	219	165	150	178	0		0.885006	7.81473	11.3449	0	0
1	777	212	167	155	178	0		0.290358	7.81473	11.3449	0	0
0	1148	199	175	160	178	0		1.80507	7.81473	11.3449	0	0
1	1269	207	165	162	178	0		0.815625	7.81473	11.3449	0	0
1	53	223	158	154	178	0		2.05585	7.81473	11.3449	0	0
1	165	228	151	156	178	0		4.85957	7.81473	11.3449	0	0
0	396	219	164	152	178	0		0.843549	7.81473	11.3449	0	0
0	635	204	164	167	178	0		1.81626	7.81473	11.3449	0	0
0	712	211	170	154	178	0		0.378235	7.81473	11.3449	0	0
0	901	219	160	156	178	0		1.26926	7.81473	11.3449	0	0
1	1316	215	166	154	178	0		0.415469	7.81473	11.3449	0	0
1	1340	211	168	156	178	0		0.296246	7.81473	11.3449	0	0
0	1468	190	189	156	178	0		7.67582	7.81473	11.3449	0	0
0	49	227	160	149	179	0		2.57308	7.81473	11.3449	0	0
0	192	230	154	152	179	0		4.30759	7.81473	11.3449	0	0
1	718	215	156	165	179	0		2.76583	7.81473	11.3449	0	0
1	892	211	166	159	179	0		0.433322	7.81473	11.3449	0	0
0	1050	219	175	142	179	0		2.82549	7.81473	11.3449	0	0
0	434	214	165	158	179	0		0.492537	7.81473	11.3449	0	0
0	451	208	170	159	179	0		0.476193	7.81473	11.3449	0	0
1	1172	215	157	165	179	0		2.52315	7.81473	11.3449	0	0
1	1423	201	182	154	179	0		3.09325	7.81473	11.3449	0	0
0	1527	208	170	159	179	0		0.476193	7.81473	11.3449	0	0
0	288	218	168	152	179	0		0.682732	7.81473	11.3449	0	0
0	318	222	175	141	179	0		3.38622	7.81473	11.3449	0	0
0	420	224	174	140	179	0		3.72728	7.81473	11.3449	0	0
0	437	206	171	161	179	0		0.722191	7.81473	11.3449	0	0
1	1322	193	177	168	179	0		3.91286	7.81473	11.3449	0	0
0	1512	215	161	162	179	0		1.2962	7.81473	11.3449	0	0
1	1705	210	165	163	179	0		0.8473	7.81473	11.3449	0	0
0	9	206	180	153	180	0		2.10507	7.81473	11.3449	0	0
0	154	226	167	146	180	0		2.28763	7.81473	11.3449	0	0
1	247	220	170	149	180	0		1.1798	7.81473	11.3449	0	0
0	298	212	174	153	180	0		0.783686	7.81473	11.3449	0	0
0	941	215	171	153	180	0		0.563405	7.81473	11.3449	0	0
1	1014	226	163	150	180	0		2.03104	7.81473	11.3449	0	0
0	1019	222	164	153	180	0		1.19122	7.81473	11.3449	0	0
0	1033	215	171	153	180	0		0.563405	7.81473	11.3449	0	0
1	1208	205	172	162	180	0		0.907872	7.81473	11.3449	0	0
1	1230	189	187	163	180	0		6.96359	7.81473	11.3449	0	0
1	1246	204	167	168	180	0		1.73975	7.81473	11.3449	0	0
1	1321	196	175	168	180	0		3.02614	7.81473	11.3449	0	0
0	1387	200	178	161	180	0		2.13455	7.81473	11.3449	0	0
0	1434	209	173	157	180	0		0.584777	7.81473	11.3449	0	0
0	126	225	162	153	180	0		1.83196	7.81473	11.3449	0	0
1	364	221	170	149	180	0		1.28855	7.81473	11.3449	0	0
0	388	225	168	147	180	0		2.00287	7.81473	11.3449	0	0
1	549	211	170	159	180	0		0.392201	7.81473	11.3449	0	0
0	852	215	169	156	180	0		0.394656	7.81473	11.3449	0	0
0	1003	219	163	158	180	0		0.997311	7.81473	11.3449	0	0
1	1043	216	175	149	180	0		1.40522	7.81473	11.3449	0	0
1	1362	203	171	166	180	0		1.44912	7.81473	11.3449	0	0
0	1586	203	193	144	180	0		8.97201	7.81473	11.3449	1	0
0	1799	213	167	160	180	0		0.469462	7.81473	11.3449	0	0
0	248	210	172	159	180	0		0.485911	7.81473	11.3449	0	0
1	273	221	159	161	180	0		2.06098	7.81473	11.3449	0	0
0	432	219	176	146	180	0		2.22073	7.81473	11.3449	0	0
1	501	219	169	153	180	0		0.732058	7.81473	11.3449	0	0
0	691	223	163	155	180	0		1.39677	7.81473	11.3449	0	0
1	1006	207	172	162	180	0		0.748428	7.81473	11.3449	0	0
0	1304	214	180	147	180	0		2.65812	7.81473	11.3449	0	0
1	1384	213	170	158	180	0		0.366364	7.81473	11.3449	0	0
0	1397	213	181	147	180	0		2.91052	7.81473	11.3449	0	0
0	1407	214	162	165	180	0		1.49316	7.81473	11.3449	0	0
1	1488	204	163	174	180	0		3.51317	7.81473	11.3449	0	0
1	1525	209	160	172	180	0		3.2621	7.81473	11.3449	0	0
0	47	218	174	150	181	0		1.25453	7.81473	11.3449	0	0
1	105	223	149	170	181	0		7.15369	7.81473	11.3449	0	0
0	174	224	172	146	181	0		2.23384	7.81473	11.3449	0	0
0	282	211	171	160	181	0		0.443579	7.81473	11.3449	0	0
1	566	214	169	159	181	0		0.394007	7.81473	11.3449	0	0
0	849	229	153	160	181	0		4.88493	7.81473	11.3449	0	0
1	1036	213	177	152	181	0		1.30141	7.81473	11.3449	0	0
1	1187	206	171	165	181	0		1.03613	7.81473	11.3449	0	0
1	1209	216	167	159	181	0		0.514188	7.81473	11.3449	0	0
0	1341	207	178	157	181	0		1.34155	7.81473	11.3449	0	0
0	176	226	162	155	181	0		1.99006	7.81473	11.3449	0	0
0	494	212	167	164	181	0		0.779755	7.81473	11.3449	0	0
0	510	209	172	162	181	0		0.6263	7.81473	11.3449	0	0
0	606	190	177	176	181	0		6.10167	7.81473	11.3449	0	0
1	944	215	171	157	181	0		0.426109	7.81473	11.3449	0	0
0	1267	220	165	158	181	0		0.897328	7.81473	11.3449	0	0
1	1345	211	169	163	181	0		0.608944	7.81473	11.3449	0	0
1	1602	208	174	161	181	0		0.752771	7.81473	11.3449	0	0
0	46	224	158	162	181	0		2.79388	7.81473	11.3449	0	0
0	727	207	172	165	181	0		0.964817	7.81473	11.3449	0	0
0	791	220	174	150	181	0		1.4019	7.81473	11.3449	0	0
0	916	214	171	159	181	0		0.404794	7.81473	11.3449	0	0
1	988	226	154	164	181	0		4.50457	7.81473	11.3449	0	0
1	1261	207	170	167	181	0		1.18799	7.81473	11.3449	0	0
1	1308	208	174	162	181	0		0.784821	7.81473	11.3449	0	0
1	1339	208	169	167	181	0		1.15394	7.81473	11.3449	0	0
1	1471	219	158	167	181	0		2.93251	7.81473	11.3449	0	0
1	1654	198	185	161	181	0		4.0543	7.81473	11.3449	0	0
0	1801	213	168	163	181	0		0.625288	7.81473	11.3449	0	0
1	92	223	169	153	182	0		1.14879	7.81473	11.3449	0	0
0	164	229	162	154	182	0		2.57138	7.81473	11.3449	0	0
1	343	222	167	156	182	0		0.958287	7.81473	11.3449	0	0
0	680	205	172	168	182	0		1.47396	7.81473	11.3449	0	0
1	769	213	169	163	182	0		0.581118	7.81473	11.3449	0	0
0	129	223	182	141	182	0		5.15589	7.81473	11.3449	0	0
0	418	221	172	153	182	0		1.01219	7.81473	11.3449	0	0
1	586	218	167	161	182	0		0.702678	7.81473	11.3449	0	0
0	625	212	177	157	182	0		0.920215	7.81473	11.3449	0	0
1	629	202	178	166	182	0		2.03948	7.81473	11.3449	0	0
0	807	216	172	158	182	0		0.470735	7.81473	11.3449	0	0
1	860	214	173	159	182	0		0.473427	7.81473	11.3449	0	0
0	1160	222	166	158	182	0		1.01995	7.81473	11.3449	0	0
1	1766	211	172	163	182	0		0.589702	7.81473	11.3449	0	0
1	237	228	161	158	182	0		2.55784	7.81473	11.3449	0	0
0	348	214	183	150	182	0		2.8804	7.81473	11.3449	0	0
1	802	221	172	154	182	0		0.93392	7.81473	11.3449	0	0
0	938	228	165	154	182	0		2.0395	7.81473	11.3449	0	0
1	1015	222	170	155	182	0		0.921061	7.81473	11.3449	0	0
1	1018	218	174	155	182	0		0.782371	7.81473	11.3449	0	0
1	1155	215	173	159	182	0		0.478825	7.81473	11.3449	0	0
1	1477	200	182	165	182	0		2.95803	7.81473	11.3449	0	0
0	19	233	161	154	183	0		3.63236	7.81473	11.3449	0	0
1	360	219	172	157	183	0		0.624778	7.81473	11.3449	0	0
0	607	215	173	160	183	0		0.474531	7.81473	11.3449	0	0
1	783	213	166	169	183	0		1.5114	7.81473	11.3449	0	0
0	873	225	170	153	183	0		1.41114	7.81473	11.3449	0	0
0	1517	225	173	150	183	0		1.8535	7.81473	11.3449	0	0
0	6	215	183	151	183	0		2.695	7.81473	11.3449	0	0
0	41	232	156	161	183	0		4.76984	7.81473	11.3449	0	0
0	203	216	181	152	183	0		2.06916	7.81473	11.3449	0	0
1	210	220	170	159	183	0		0.643988	7.81473	11.3449	0	0
0	287	219	158	172	183	0		3.96119	7.81473	11.3449	0	0
1	433	200	181	168	183	0		2.93541	7.81473	11.3449	0	0
1	481	222	169	158	183	0		0.845889	7.81473	11.3449	0	0
0	705	197	177	175	183	0		4.0492	7.81473	11.3449	0	0
1	730	207	179	163	183	0		1.39521	7.81473	11.3449	0	0
0	796	220	165	164	183	0		1.24895	7.81473	11.3449	0	0
0	897	207	165	177	183	0		3.66858	7.81473	11.3449	0	0
0	1008	225	172	152	183	0		1.55274	7.81473	11.3449	0	0
1	1253	215	169	165	183	0		0.738941	7.81473	11.3449	0	0
1	1319	219	174	156	183	0		0.76726	7.81473	11.3449	0	0
0	1461	200	185	164	183	0		3.59874	7.81473	11.3449	0	0
0	1489	217	161	171	183	0		2.83858	7.81473	11.3449	0	0
0	1554	208	178	163	183	0		1.17263	7.81473	11.3449	0	0
1	1841	246	159	144	183	0		9.17412	7.81473	11.3449	1	0
1	182	220	173	157	183	0		0.719257	7.81473	11.3449	0	0
0	250	225	163	162	183	0		1.92464	7.81473	11.3449	0	0
0	284	218	173	159	183	0		0.550994	7.81473	11.3449	0	0
0	347	225	169	156	183	0		1.24079	7.81473	11.3449	0	0
0	1259	221	182	147	183	0		3.42298	7.81473	11.3449	0	0
1	1309	210	172	168	183	0		1.04291	7.81473	11.3449	0	0
1	1333	218	170	162	183	0		0.582557	7.81473	11.3449	0	0
0	1412	196	197	157	183	0		9.51204	7.81473	11.3449	1	0
0	62	229	168	154	184	0		2.01458	7.81473	11.3449	0	0
1	179	230	157	164	184	0		4.35134	7.81473	11.3449	0	0
0	244	227	171	153	184	0		1.70761	7.81473	11.3449	0	0
0	374	221	176	154	184	0		1.22466	7.81473	11.3449	0	0
0	463	225	167	159	184	0		1.30502	7.81473	11.3449	0	0
0	509	210	179	162	184	0		1.1279	7.81473	11.3449	0	0
1	605	221	166	164	184	0		1.19763	7.81473	11.3449	0	0
1	633	200	180	171	184	0		3.06804	7.81473	11.3449	0	0
0	824	209	165	177	184	0		3.50587	7.81473	11.3449	0	0
0	985	219	167	165	184	0		1.03064	7.81473	11.3449	0	0
1	1559	210	173	168	184	0		1.02948	7.81473	11.3449	0	0
0	1630	210	183	158	184	0		2.01083	7.81473	11.3449	0	0
0	1672	216	183	152	184	0		2.52236	7.81473	11.3449	0	0
0	161	228	174	150	184	0		2.36453	7.81473	11.3449	0	0
0	357	216	166	170	184	0		1.66933	7.81473	11.3449	0	0
0	398	225	170	157	184	0		1.16959	7.81473	11.3449	0	0
0	562	206	171	175	184	0		2.53923	7.81473	11.3449	0	0
1	1239	217	169	166	184	0		0.854824	7.81473	11.3449	0	0
0	1395	224	172	156	184	0		1.09223	7.81473	11.3449	0	0
0	98	220	173	160	184	0		0.624389	7.81473	11.3449	0	0
0	235	224	171	158	184	0		0.996039	7.81473	11.3449	0	0
0	310	230	170	153	184	0		2.21317	7.81473	11.3449	0	0
0	542	213	171	169	184	0		1.04839	7.81473	11.3449	0	0
1	609	224	171	158	184	0		0.996039	7.81473	11.3449	0	0
0	920	220	169	164	184	0		0.829558	7.81473	11.3449	0	0
1	1235	214	168	171	184	0		1.56126	7.81473	11.3449	0	0
1	1274	212	168	173	184	0		1.96534	7.81473	11.3449	0	0
1	1301	218	163	172	184	0		2.62367	7.81473	11.3449	0	0
0	125	224	165	165	185	0		1.70432	7.81473	11.3449	0	0
1	206	220	177	157	185	0		0.988642	7.81473	11.3449	0	0
0	263	225	170	159	185	0		1.11038	7.81473	11.3449	0	0
0	1326	204	179	171	185	0		2.24559	7.81473	11.3449	0	0
1	1500	212	172	170	185	0		1.15878	7.81473	11.3449	0	0
1	233	220	175	160	185	0		0.681728	7.81473	11.3449	0	0
1	373	222	166	167	185	0		1.55181	7.81473	11.3449	0	0
0	766	221	171	163	185	0		0.727356	7.81473	11.3449	0	0
0	794	226	169	160	185	0		1.27692	7.81473	11.3449	0	0
0	902	216	163	176	185	0		3.45382	7.81473	11.3449	0	0
0	1023	224	175	156	185	0		1.20041	7.81473	11.3449	0	0
1	1357	207	180	168	185	0		1.677	7.81473	11.3449	0	0
0	1418	210	183	162	185	0		1.75958	7.81473	11.3449	0	0
1	1629	217	166	172	185	0		2.01351	7.81473	11.3449	0	0
0	1644	219	182	154	185	0		2.02655	7.81473	11.3449	0	0
1	195	221	168	167	185	0		1.21054	7.81473	11.3449	0	0
0	687	222	165	169	185	0		1.9586	7.81473	11.3449	0	0
0	761	221	172	163	185	0		0.69124	7.81473	11.3449	0	0
1	994	210	181	165	185	0		1.38254	7.81473	11.3449	0	0
0	1020	220	172	164	185	0		0.666859	7.81473	11.3449	0	0
1	1215	205	185	166	185	0		2.69451	7.81473	11.3449	0	0
1	1330	215	171	170	185	0		1.11371	7.81473	11.3449	0	0
1	1474	213	180	163	185	0		1.04971	7.81473	11.3449	0	0
1	1490	214	179	163	185	0		0.89072	7.81473	11.3449	0	0
1	1496	200	191	165	185	0		5.27468	7.81473	11.3449	0	0
0	83	231	171	155	186	0		2.18913	7.81473	11.3449	0	0
0	117	220	173	164	186	0		0.641549	7.81473	11.3449	0	0
0	267	230	164	163	186	0		2.59207	7.81473	11.3449	0	0
0	305	224	171	162	186	0		0.94107	7.81473	11.3449	0	0
1	523	210	181	166	186	0		1.39231	7.81473	11.3449	0	0
0	886	227	170	160	186	0		1.3412	7.81473	11.3449	0	0
1	1030	223	172	162	186	0		0.816243	7.81473	11.3449	0	0
1	1216	211	177	169	186	0		1.10947	7.81473	11.3449	0	0
1	3	213	177	168	186	0		0.907427	7.81473	11.3449	0	0
0	416	226	167	165	186	0		1.63297	7.81473	11.3449	0	0
0	667	212	174	172	186	0		1.32817	7.81473	11.3449	0	0
0	870	224	176	158	186	0		1.09562	7.81473	11.3449	0	0
0	1034	215	189	154	186	0		3.8608	7.81473	11.3449	0	0
0	1220	225	183	150	186	0		3.30502	7.81473	11.3449	0	0
0	1263	211	177	170	186	0		1.18915	7.81473	11.3449	0	0
1	1369	204	187	167	186	0		3.30024	7.81473	11.3449	0	0
1	1409	215	176	167	186	0		0.736213	7.81473	11.3449	0	0
1	1465	210	177	171	186	0		1.36964	7.81473	11.3449	0	0
0	1638	215	176	167	186	0		0.736213	7.81473	11.3449	0	0
0	427	221	186	152	186	0		3.3566	7.81473	11.3449	0	0
0	641	215	175	169	186	0		0.85383	7.81473	11.3449	0	0
0	677	212	189	158	186	0		3.39692	7.81473	11.3449	0	0
1	1169	223	168	168	186	0		1.44166	7.81473	11.3449	0	0
1	1218	212	178	169	186	0		1.07705	7.81473	11.3449	0	0
1	1338	211	175	173	186	0		1.50495	7.81473	11.3449	0	0
0	1467	199	195	165	186	0		6.93248	7.81473	11.3449	0	0
0	54	219	174	167	187	0		0.706775	7.81473	11.3449	0	0
0	59	234	161	165	187	0		4.18988	7.81473	11.3449	0	0
1	80	233	167	160	187	0		2.62504	7.81473	11.3449	0	0
1	135	226	169	165	187	0		1.38306	7.81473	11.3449	0	0
0	172	226	168	166	187	0		1.56086	7.81473	11.3449	0	0
1	265	224	167	169	187	0		1.77571	7.81473	11.3449	0	0
0	425	222	176	162	187	0		0.75681	7.81473	11.3449	0	0
1	587	214	181	165	187	0		1.0876	7.81473	11.3449	0	0
0	610	229	174	157	187	0		1.6748	7.81473	11.3449	0	0
0	749	217	177	166	187	0		0.687033	7.81473	11.3449	0	0
1	1011	227	170	163	187	0		1.33964	7.81473	11.3449	0	0
1	1361	209	179	172	187	0		1.65301	7.81473	11.3449	0	0
0	1596	221	175	164	187	0		0.669785	7.81473	11.3449	0	0
1	1689	215	169	176	187	0		2.28842	7.81473	11.3449	0	0
0	69	223	180	158	187	0		1.37374	7.81473	11.3449	0	0
1	137	223	176	162	187	0		0.81335	7.81473	11.3449	0	0
1	222	225	176	160	187	0		1.04892	7.81473	11.3449	0	0
0	380	222	172	167	187	0		0.897971	7.81473	11.3449	0	0
1	423	218	186	157	187	0		2.44717	7.81473	11.3449	0	0
1	768	227	181	153	187	0		2.53941	7.81473	11.3449	0	0
1	1204	218	171	172	187	0		1.33895	7.81473	11.3449	0	0
0	1270	219	183	159	187	0		1.58374	7.81473	11.3449	0	0
0	1302	222	172	167	187	0		0.897971	7.81473	11.3449	0	0
0	1667	221	173	167	187	0		0.796221	7.81473	11.3449	0	0
1	1740	208	181	172	187	0		1.91761	7.81473	11.3449	0	0
0	68	229	176	157	187	0		1.72999	7.81473	11.3449	0	0
0	81	217	178	167	187	0		0.751481	7.81473	11.3449	0	0
0	127	227	167	168	187	0		1.98133	7.81473	11.3449	0	0
0	476	194	180	188	187	0		8.12021	7.81473	11.3449	1	0
0	1368	211	187	164	187	0		2.38319	7.81473	11.3449	0	0
0	1532	214	186	162	187	0		2.04287	7.81473	11.3449	0	0
0	184	225	185	153	188	0		3.11672	7.81473	11.3449	0	0
0	197	224	168	171	188	0		1.84623	7.81473	11.3449	0	0
1	303	216	180	167	188	0		0.901094	7.81473	11.3449	0	0
0	375	219	173	171	188	0		1.05554	7.81473	11.3449	0	0
1	525	227	164	172	188	0		3.09107	7.81473	11.3449	0	0
0	845	218	177	168	188	0		0.739126	7.81473	11.3449	0	0
0	1007	226	180	157	188	0		1.70617	7.81473	11.3449	0	0
1	1173	223	168	172	188	0		1.90764	7.81473	11.3449	0	0
0	1194	209	196	158	188	0		6.22092	7.81473	11.3449	0	0
1	1620	208	181	174	188	0		2.1047	7.81473	11.3449	0	0
1	1842	240	169	154	188	0		4.46621	7.81473	11.3449	0	0
1	94	219	184	161	188	0		1.55907	7.81473	11.3449	0	0
1	218	218	177	169	188	0		0.784651	7.81473	11.3449	0	0
0	221	220	183	161	188	0		1.39772	7.81473	11.3449	0	0
0	261	228	172	164	188	0		1.31783	7.81473	11.3449	0	0
1	313	216	177	171	188	0		0.966299	7.81473	11.3449	0	0
0	754	224	171	169	188	0		1.23992	7.81473	11.3449	0	0
0	1223	225	178	161	188	0		1.08034	7.81473	11.3449	0	0
0	1513	220	172	172	188	0		1.25827	7.81473	11.3449	0	0
0	1615	233	164	167	188	0		3.41569	7.81473	11.3449	0	0
0	86	227	176	162	188	0		1.1328	7.81473	11.3449	0	0
0	181	229	173	163	188	0		1.38717	7.81473	11.3449	0	0
1	1323	207	181	177	188	0		2.61898	7.81473	11.3449	0	0
0	1402	224	171	170	188	0		1.32365	7.81473	11.3449	0	0
0	1703	203	191	171	188	0		4.49868	7.81473	11.3449	0	0
0	55	234	163	169	189	0		4.04985	7.81473	11.3449	0	0
0	194	227	182	157	189	0		2.04582	7.81473	11.3449	0	0
1	511	223	171	172	189	0		1.46809	7.81473	11.3449	0	0
0	568	223	177	166	189	0		0.777915	7.81473	11.3449	0	0
0	672	216	182	168	189	0		1.08495	7.81473	11.3449	0	0
1	1244	211	184	171	189	0		1.79448	7.81473	11.3449	0	0
0	1447	214	186	166	189	0		1.80431	7.81473	11.3449	0	0
1	1548	211	180	175	189	0		1.77872	7.81473	11.3449	0	0
1	27	234	162	171	189	0		4.57672	7.81473	11.3449	0	0
0	190	221	181	165	189	0		0.930608	7.81473	11.3449	0	0
1	276	220	179	168	189	0		0.780989	7.81473	11.3449	0	0
0	354	228	172	167	189	0		1.38073	7.81473	11.3449	0	0
0	424	225	176	166	189	0		0.88853	7.81473	11.3449	0	0
0	823	225	174	168	189	0		1.0042	7.81473	11.3449	0	0
0	1256	225	170	172	189	0		1.72594	7.81473	11.3449	0	0
1	1508	222	174	171	189	0		1.04058	7.81473	11.3449	0	0
0	1876	234	177	156	189	0		2.67726	7.81473	11.3449	0	0
1	64	234	170	164	189	0		2.41554	7.81473	11.3449	0	0
0	325	218	179	171	189	0		0.919599	7.81473	11.3449	0	0
1	1241	216	179	173	189	0		1.14132	7.81473	11.3449	0	0
0	1359	220	188	160	189	0		2.46442	7.81473	11.3449	0	0
1	1491	214	185	169	189	0		1.5843	7.81473	11.3449	0	0
0	1543	223	177	168	189	0		0.804047	7.81473	11.3449	0	0
0	1585	212	196	160	189	0		5.46101	7.81473	11.3449	0	0
1	1631	208	185	175	189	0		2.57661	7.81473	11.3449	0	0
0	114	224	179	166	190	0		0.866551	7.81473	11.3449	0	0
0	217	226	179	164	190	0		1.04015	7.81473	11.3449	0	0
0	324	218	186	165	190	0		1.61455	7.81473	11.3449	0	0
0	346	220	179	170	190	0		0.836358	7.81473	11.3449	0	0
0	640	227	171	171	190	0		1.64531	7.81473	11.3449	0	0
1	782	216	174	179	190	0		2.17469	7.81473	11.3449	0	0
0	1166	226	183	160	190	0		1.71224	7.81473	11.3449	0	0
0	1234	227	183	159	190	0		1.90799	7.81473	11.3449	0	0
0	1288	215	196	158	190	0		5.5244	7.81473	11.3449	0	0
1	1327	213	183	173	190	0		1.57152	7.81473	11.3449	0	0
0	1416	214	180	175	190	0		1.48234	7.81473	11.3449	0	0
0	1538	215	181	173	190	0		1.26606	7.81473	11.3449	0	0
0	220	210	183	177	190	0		2.27953	7.81473	11.3449	0	0
1	245	228	171	171	190	0		1.73985	7.81473	11.3449	0	0
0	1185	235	180	155	190	0		3.21129	7.81473	11.3449	0	0
1	1276	216	185	169	190	0		1.43016	7.81473	11.3449	0	0
1	1410	218	177	175	190	0		1.27328	7.81473	11.3449	0	0
1	1414	219	183	168	190	0		1.06513	7.81473	11.3449	0	0
1	1608	219	175	176	190	0		1.49193	7.81473	11.3449	0	0
1	1680	226	174	170	190	0		1.1722	7.81473	11.3449	0	0
1	170	223	179	169	190	0		0.833744	7.81473	11.3449	0	0
1	770	222	183	166	190	0		1.08849	7.81473	11.3449	0	0
1	1285	221	170	180	190	0		2.86161	7.81473	11.3449	0	0
1	1311	219	174	178	190	0		1.88785	7.81473	11.3449	0	0
1	1618	223	171	177	190	0		2.16035	7.81473	11.3449	0	0
1	1846	241	172	158	190	0		4.06656	7.81473	11.3449	0	0
0	70	222	181	169	191	0		0.882266	7.81473	11.3449	0	0
1	110	227	176	169	191	0		1.07745	7.81473	11.3449	0	0
0	123	224	182	166	191	0		1.03627	7.81473	11.3449	0	0
1	171	227	180	165	191	0		1.10848	7.81473	11.3449	0	0
0	369	222	182	168	191	0		0.946406	7.81473	11.3449	0	0
0	626	227	169	176	191	0		2.59647	7.81473	11.3449	0	0
1	639	218	181	173	191	0		1.08886	7.81473	11.3449	0	0
0	868	226	180	166	191	0		1.00575	7.81473	11.3449	0	0
1	1363	211	180	181	191	0		2.63481	7.81473	11.3449	0	0
1	1578	206	184	182	191	0		3.72785	7.81473	11.3449	0	0
0	1652	217	193	162	191	0		3.63359	7.81473	11.3449	0	0
0	1681	217	184	171	191	0		1.26162	7.81473	11.3449	0	0
1	119	227	182	164	191	0		1.29233	7.81473	11.3449	0	0
1	200	228	174	171	191	0		1.38842	7.81473	11.3449	0	0
0	227	234	177	162	191	0		2.03785	7.81473	11.3449	0	0
1	655	225	179	169	191	0		0.900522	7.81473	11.3449	0	0
1	1222	223	179	171	191	0		0.889154	7.81473	11.3449	0	0
0	1264	217	187	169	191	0		1.65271	7.81473	11.3449	0	0
0	1607	205	184	184	191	0		4.29787	7.81473	11.3449	0	0
0	1682	228	174	171	191	0		1.38842	7.81473	11.3449	0	0
0	271	228	173	173	191	0		1.65028	7.81473	11.3449	0	0
0	567	220	184	170	191	0		1.11842	7.81473	11.3449	0	0
1	1025	217	168	189	191	0		5.86131	7.81473	11.3449	0	0
0	1203	213	184	177	191	0		1.95469	7.81473	11.3449	0	0
1	1377	218	187	169	191	0		1.59013	7.81473	11.3449	0	0
0	1594	223	180	171	191	0		0.895322	7.81473	11.3449	0	0
1	1831	237	174	163	191	0		2.62394	7.81473	11.3449	0	0
1	1867	243	174	157	191	0		4.59213	7.81473	11.3449	0	0
0	93	225	179	171	192	0		0.942278	7.81473	11.3449	0	0
0	180	221	181	173	192	0		0.995629	7.81473	11.3449	0	0
0	330	228	179	168	192	0		1.07541	7.81473	11.3449	0	0
1	1483	216	169	190	192	0		5.9827	7.81473	11.3449	0	0
0	73	219	182	175	192	0		1.20144	7.81473	11.3449	0	0
0	183	227	180	169	192	0		1.00926	7.81473	11.3449	0	0
0	731	205	184	187	192	0		4.92137	7.81473	11.3449	0	0
0	1200	230	177	169	192	0		1.29131	7.81473	11.3449	0	0
0	1580	224	170	182	192	0		3.34601	7.81473	11.3449	0	0
0	810	222	180	175	192	0		1.10249	7.81473	11.3449	0	0
0	1528	224	192	161	192	0		3.27868	7.81473	11.3449	0	0
0	1614	230	166	181	192	0		4.57912	7.81473	11.3449	0	0
0	1658	227	186	164	192	0		1.73266	7.81473	11.3449	0	0
0	34	229	181	168	193	0		1.17643	7.81473	11.3449	0	0
1	97	225	179	174	193	0		1.08187	7.81473	11.3449	0	0
0	147	228	180	170	193	0		1.06832	7.81473	11.3449	0	0
0	148	225	185	168	193	0		1.24126	7.81473	11.3449	0	0
0	178	229	176	173	193	0		1.41215	7.81473	11.3449	0	0
1	535	222	176	180	193	0		1.93751	7.81473	11.3449	0	0
1	654	221	180	177	193	0		1.29337	7.81473	11.3449	0	0
0	702	215	185	178	193	0		1.88502	7.81473	11.3449	0	0
1	839	227	177	174	193	0		1.26663	7.81473	11.3449	0	0
0	1296	212	181	185	193	0		3.2247	7.81473	11.3449	0	0
0	1300	218	188	172	193	0		1.68198	7.81473	11.3449	0	0
1	1324	212	191	175	193	0		2.87213	7.81473	11.3449	0	0
0	1436	225	179	174	193	0		1.08187	7.81473	11.3449	0	0
1	1702	222	171	185	193	0		3.80143	7.81473	11.3449	0	0
0	75	232	177	170	193	0		1.51436	7.81473	11.3449	0	0
1	101	223	185	171	193	0		1.14309	7.81473	11.3449	0	0
1	142	223	190	166	193	0		2.13477	7.81473	11.3449	0	0
0	143	225	183	171	193	0		1.01839	7.81473	11.3449	0	0
0	304	228	182	169	193	0		1.11473	7.81473	11.3449	0	0
0	1009	222	186	171	193	0		1.25437	7.81473	11.3449	0	0
0	1250	226	187	166	193	0		1.64362	7.81473	11.3449	0	0
1	1310	215	183	181	193	0		2.14549	7.81473	11.3449	0	0
1	1448	210	180	189	193	0		4.51611	7.81473	11.3449	0	0
0	1649	227	183	169	193	0		1.10997	7.81473	11.3449	0	0
0	1190	234	181	165	193	0		1.85181	7.81473	11.3449	0	0
0	38	235	174	172	194	0		2.26119	7.81473	11.3449	0	0
0	61	227	177	177	194	0		1.52652	7.81473	11.3449	0	0
0	585	219	188	174	194	0		1.61306	7.81473	11.3449	0	0
0	1199	225	184	172	194	0		1.06948	7.81473	11.3449	0	0
1	1315	216	190	175	194	0		2.17474	7.81473	11.3449	0	0
0	1438	212	187	182	194	0		2.84802	7.81473	11.3449	0	0
1	1463	209	185	187	194	0		4.09761	7.81473	11.3449	0	0
0	1537	225	177	179	194	0		1.69759	7.81473	11.3449	0	0
0	189	227	184	171	194	0		1.11985	7.81473	11.3449	0	0
1	201	237	167	178	194	0		4.70122	7.81473	11.3449	0	0
0	252	227	188	167	194	0		1.72528	7.81473	11.3449	0	0
0	323	222	190	170	194	0		1.84094	7.81473	11.3449	0	0
0	1022	225	183	174	194	0		1.06112	7.81473	11.3449	0	0
0	1153	218	182	182	194	0		2.00751	7.81473	11.3449	0	0
0	1389	218	190	174	194	0		1.97064	7.81473	11.3449	0	0
1	1478	214	191	177	194	0		2.63297	7.81473	11.3449	0	0
0	1610	225	180	177	194	0		1.26271	7.81473	11.3449	0	0
0	84	228	187	168	194	0		1.54675	7.81473	11.3449	0	0
0	169	222	189	172	194	0		1.59899	7.81473	11.3449	0	0
0	291	227	177	179	194	0		1.75108	7.81473	11.3449	0	0
0	686	224	185	174	194	0		1.14302	7.81473	11.3449	0	0
1	1150	216	186	181	194	0		2.12697	7.81473	11.3449	0	0
0	1184	222	181	180	194	0		1.5549	7.81473	11.3449	0	0
0	1336	218	193	172	194	0		2.57825	7.81473	11.3449	0	0
0	1551	235	178	170	194	0		1.82898	7.81473	11.3449	0	0
0	1616	224	187	172	194	0		1.3051	7.81473	11.3449	0	0
1	1657	217	177	189	194	0		3.93661	7.81473	11.3449	0	0
1	1868	241	180	162	194	0		3.33682	7.81473	11.3449	0	0
1	124	227	181	176	195	0		1.19328	7.81473	11.3449	0	0
0	219	231	180	173	195	0		1.32207	7.81473	11.3449	0	0
0	277	225	182	177	195	0		1.2039	7.81473	11.3449	0	0
1	688	222	180	182	195	0		1.87433	7.81473	11.3449	0	0
1	1206	214	192	178	195	0		2.83444	7.81473	11.3449	0	0
0	1247	216	187	181	195	0		2.18457	7.81473	11.3449	0	0
0	152	235	171	179	195	0		3.48383	7.81473	11.3449	0	0
0	167	232	175	178	195	0		2.22911	7.81473	11.3449	0	0
0	368	229	187	169	195	0		1.51746	7.81473	11.3449	0	0
0	1383	223	177	185	195	0		2.68329	7.81473	11.3449	0	0
1	1592	224	178	183	195	0		2.17402	7.81473	11.3449	0	0
1	108	225	185	176	195	0		1.18501	7.81473	11.3449	0	0
0	410	222	191	173	195	0		1.86762	7.81473	11.3449	0	0
0	412	226	184	176	195	0		1.15713	7.81473	11.3449	0	0
1	573	218	190	178	195	0		2.04083	7.81473	11.3449	0	0
1	1400	229	181	176	195	0		1.26924	7.81473	11.3449	0	0
1	1611	228	168	190	195	0		6.15757	7.81473	11.3449	0	0
1	1855	240	182	164	195	0		2.92815	7.81473	11.3449	0	0
1	212	226	187	174	196	0		1.26673	7.81473	11.3449	0	0
0	1177	231	185	171	196	0		1.36749	7.81473	11.3449	0	0
0	1282	212	195	180	196	0		3.80819	7.81473	11.3449	0	0
1	1422	214	193	180	196	0		3.08739	7.81473	11.3449	0	0
0	1433	214	200	173	196	0		4.93189	7.81473	11.3449	0	0
1	1661	213	180	194	196	0		5.42026	7.81473	11.3449	0	0
1	1833	244	181	162	196	0		4.01372	7.81473	11.3449	0	0
1	1852	246	179	162	196	0		4.53349	7.81473	11.3449	0	0
1	104	226	189	173	196	0		1.47733	7.81473	11.3449	0	0
0	185	228	184	176	196	0		1.18793	7.81473	11.3449	0	0
1	1334	214	187	187	196	0		3.26332	7.81473	11.3449	0	0
0	1786	224	189	175	196	0		1.47676	7.81473	11.3449	0	0
1	4	218	189	182	196	0		2.19111	7.81473	11.3449	0	0
0	223	228	186	175	196	0		1.22389	7.81473	11.3449	0	0
0	230	231	181	177	196	0		1.43346	7.81473	11.3449	0	0
0	1260	231	186	172	196	0		1.38438	7.81473	11.3449	0	0
0	1320	217	190	182	196	0		2.3954	7.81473	11.3449	0	0
0	1343	215	183	191	196	0		4.01448	7.81473	11.3449	0	0
0	1556	229	180	180	196	0		1.64042	7.81473	11.3449	0	0
1	1613	216	190	183	196	0		2.616	7.81473	11.3449	0	0
1	175	232	174	184	197	0		3.29276	7.81473	11.3449	0	0
0	67	229	191	171	197	0		1.87097	7.81473	11.3449	0	0
0	238	229	184	178	197	0		1.2947	7.81473	11.3449	0	0
1	1176	227	183	181	197	0		1.50678	7.81473	11.3449	0	0
1	1342	222	194	175	197	0		2.3171	7.81473	11.3449	0	0
0	1449	218	182	191	197	0		3.71625	7.81473	11.3449	0	0
1	1464	215	193	183	197	0		3.1128	7.81473	11.3449	0	0
1	1487	221	187	183	197	0		1.89967	7.81473	11.3449	0	0
1	1519	227	184	180	197	0		1.39098	7.81473	11.3449	0	0
1	1673	217	188	186	197	0		2.70964	7.81473	11.3449	0	0
0	1706	220	189	182	197	0		1.98752	7.81473	11.3449	0	0
0	58	237	177	178	197	0		2.49498	7.81473	11.3449	0	0
0	66	231	184	177	197	0		1.33083	7.81473	11.3449	0	0
0	79	232	182	178	197	0		1.49731	7.81473	11.3449	0	0
1	249	231	181	180	197	0		1.64786	7.81473	11.3449	0	0
0	1603	227	183	182	197	0		1.60654	7.81473	11.3449	0	0
0	1640	216	194	182	197	0		3.04117	7.81473	11.3449	0	0
1	157	229	189	175	198	0		1.43709	7.81473	11.3449	0	0
0	1411	219	185	189	198	0		2.97443	7.81473	11.3449	0	0
0	112	227	188	179	198	0		1.39152	7.81473	11.3449	0	0
0	156	233	180	181	198	0		1.96056	7.81473	11.3449	0	0
1	1227	224	190	180	198	0		1.65313	7.81473	11.3449	0	0
1	1460	220	189	185	198	0		2.27477	7.81473	11.3449	0	0
0	1562	227	185	182	198	0		1.53612	7.81473	11.3449	0	0
0	1583	227	185	182	198	0		1.53612	7.81473	11.3449	0	0
0	1595	225	189	180	198	0		1.53575	7.81473	11.3449	0	0
0	1754	220	193	181	198	0		2.33232	7.81473	11.3449	0	0
0	258	227	181	187	198	0		2.46825	7.81473	11.3449	0	0
0	1272	228	196	171	198	0		2.78816	7.81473	11.3449	0	0
0	1404	219	190	186	198	0		2.54919	7.81473	11.3449	0	0
1	1472	222	189	184	198	0		1.98883	7.81473	11.3449	0	0
0	1612	236	169	190	198	0		6.47321	7.81473	11.3449	0	0
0	1666	231	182	182	198	0		1.75308	7.81473	11.3449	0	0
1	1835	239	184	172	198	0		2.12925	7.81473	11.3449	0	0
0	1	220	192	184	199	0		2.38944	7.81473	11.3449	0	0
1	43	236	179	181	199	0		2.35041	7.81473	11.3449	0	0
0	153	230	186	180	199	0		1.40249	7.81473	11.3449	0	0
0	631	223	196	177	199	0		2.54994	7.81473	11.3449	0	0
0	1221	219	197	180	199	0		3.10897	7.81473	11.3449	0	0
0	1314	232	187	177	199	0		1.39907	7.81473	11.3449	0	0
0	1485	217	198	181	199	0		3.61112	7.81473	11.3449	0	0
1	138	225	186	186	199	0		2.00119	7.81473	11.3449	0	0
0	145	226	190	181	199	0		1.60272	7.81473	11.3449	0	0
0	1165	232	180	185	199	0		2.38245	7.81473	11.3449	0	0
1	1420	214	201	182	199	0		4.88559	7.81473	11.3449	0	0
0	132	228	190	180	199	0		1.5168	7.81473	11.3449	0	0
1	1193	220	188	190	199	0		2.96252	7.81473	11.3449	0	0
0	1354	229	190	179	199	0		1.49013	7.81473	11.3449	0	0
0	1589	224	198	176	199	0		2.95145	7.81473	11.3449	0	0
0	1625	233	181	184	199	0		2.17336	7.81473	11.3449	0	0
0	1655	218	189	191	199	0		3.39133	7.81473	11.3449	0	0
0	106	233	184	182	200	0		1.70153	7.81473	11.3449	0	0
1	173	227	189	183	200	0		1.63041	7.81473	11.3449	0	0
0	253	238	178	183	200	0		2.94848	7.81473	11.3449	0	0
0	268	231	187	181	200	0		1.47103	7.81473	11.3449	0	0
0	358	229	191	179	200	0		1.5643	7.81473	11.3449	0	0
1	758	224	190	185	200	0		1.97193	7.81473	11.3449	0	0
1	1178	216	199	184	200	0		4.05897	7.81473	11.3449	0	0
1	1188	224	190	185	200	0		1.97193	7.81473	11.3449	0	0
0	1430	212	198	189	200	0		5.03808	7.81473	11.3449	0	0
0	1473	225	192	182	200	0		1.84467	7.81473	11.3449	0	0
1	1572	218	183	198	200	0		5.47357	7.81473	11.3449	0	0
1	1691	219	189	191	200	0		3.25415	7.81473	11.3449	0	0
1	99	233	178	189	200	0		3.45687	7.81473	11.3449	0	0
1	139	225	190	185	200	0		1.90679	7.81473	11.3449	0	0
0	1167	231	189	180	200	0		1.4697	7.81473	11.3449	0	0
1	1279	220	190	190	200	0		2.96939	7.81473	11.3449	0	0
0	1391	210	203	187	200	0		6.50201	7.81473	11.3449	0	0
0	1643	226	192	182	200	0		1.79026	7.81473	11.3449	0	0
1	186	225	192	184	200	0		1.94334	7.81473	11.3449	0	0
0	1284	228	190	183	200	0		1.63634	7.81473	11.3449	0	0
0	1469	221	201	179	200	0		3.81002	7.81473	11.3449	0	0
0	1622	235	180	186	200	0		2.70911	7.81473	11.3449	0	0
1	72	234	188	180	201	0		1.54752	7.81473	11.3449	0	0
0	128	231	188	183	201	0		1.5786	7.81473	11.3449	0	0
1	131	224	192	186	201	0		2.16044	7.81473	11.3449	0	0
1	166	228	189	185	201	0		1.75164	7.81473	11.3449	0	0
0	204	228	191	183	201	0		1.68264	7.81473	11.3449	0	0
0	1419	227	189	186	201	0		1.87675	7.81473	11.3449	0	0
0	1453	218	192	192	201	0		3.62945	7.81473	11.3449	0	0
1	1659	223	194	185	201	0		2.34213	7.81473	11.3449	0	0
1	1843	244	186	172	201	0		2.92065	7.81473	11.3449	0	0
0	111	227	194	182	201	0		1.93507	7.81473	11.3449	0	0
0	1258	232	193	178	201	0		1.77902	7.81473	11.3449	0	0
0	1331	223	198	182	201	0		2.83066	7.81473	11.3449	0	0
1	1398	217	199	187	201	0		4.02024	7.81473	11.3449	0	0
0	1547	222	195	186	201	0		2.61911	7.81473	11.3449	0	0
0	140	231	186	187	201	0		2.00495	7.81473	11.3449	0	0
0	1154	229	189	186	201	0		1.81377	7.81473	11.3449	0	0
0	1294	222	197	185	201	0		2.83049	7.81473	11.3449	0	0
0	1347	230	197	177	201	0		2.40288	7.81473	11.3449	0	0
0	1392	225	202	177	201	0		3.79736	7.81473	11.3449	0	0
0	1427	232	184	188	201	0		2.31851	7.81473	11.3449	0	0
0	1442	228	190	186	201	0		1.84822	7.81473	11.3449	0	0
0	286	226	185	194	202	0		3.39501	7.81473	11.3449	0	0
0	1290	228	194	183	202	0		1.90831	7.81473	11.3449	0	0
0	1375	226	199	180	202	0		2.80106	7.81473	11.3449	0	0
0	1555	236	184	185	202	0		2.14065	7.81473	11.3449	0	0
0	1627	230	183	192	202	0		3.10608	7.81473	11.3449	0	0
0	1696	237	182	186	202	0		2.5648	7.81473	11.3449	0	0
1	136	232	188	186	202	0		1.81377	7.81473	11.3449	0	0
0	1189	220	193	193	202	0		3.52481	7.81473	11.3449	0	0
0	1394	226	202	178	202	0		3.62463	7.81473	11.3449	0	0
0	1479	228	195	183	202	0		2.01246	7.81473	11.3449	0	0
0	1606	228	196	182	202	0		2.12939	7.81473	11.3449	0	0
0	1198	218	204	185	202	0		4.91519	7.81473	11.3449	0	0
0	1207	231	190	186	202	0		1.78248	7.81473	11.3449	0	0
0	1388	225	198	184	202	0		2.64267	7.81473	11.3449	0	0
0	1561	234	191	182	202	0		1.64851	7.81473	11.3449	0	0
1	1482	223	199	186	203	0		3.06248	7.81473	11.3449	0	0
0	1568	224	189	195	203	0		3.42646	7.81473	11.3449	0	0
0	1569	222	192	194	203	0		3.39441	7.81473	11.3449	0	0
1	1609	229	186	193	203	0		2.94656	7.81473	11.3449	0	0
0	1624	221	201	186	203	0		3.7065	7.81473	11.3449	0	0
0	1647	226	193	189	203	0		2.3269	7.81473	11.3449	0	0
1	1827	242	191	175	203	0		2.50907	7.81473	11.3449	0	0
0	1158	232	190	187	203	0		1.85673	7.81473	11.3449	0	0
0	1202	235	196	178	203	0		2.20818	7.81473	11.3449	0	0
0	1278	241	179	189	203	0		3.95027	7.81473	11.3449	0	0
0	1444	223	189	197	203	0		3.95819	7.81473	11.3449	0	0
0	1850	247	190	172	203	0		3.55917	7.81473	11.3449	0	0
1	426	226	195	189	203	0		2.44153	7.81473	11.3449	0	0
0	1441	214	198	198	203	0		5.91097	7.81473	11.3449	0	0
0	1601	227	192	191	203	0		2.45097	7.81473	11.3449	0	0
0	1164	237	184	190	204	0		2.80955	7.81473	11.3449	0	0
1	1243	225	195	191	204	0		2.72697	7.81473	11.3449	0	0
0	1455	225	193	193	204	0		2.90301	7.81473	11.3449	0	0
0	1853	250	192	169	204	0		4.75167	7.81473	11.3449	0	0
1	1873	248	189	174	204	0		3.50553	7.81473	11.3449	0	0
0	1162	224	195	193	204	0		3.07644	7.81473	11.3449	0	0
0	1171	235	191	186	204	0		1.81661	7.81473	11.3449	0	0
1	1287	224	196	192	204	0		3.01406	7.81473	11.3449	0	0
0	1459	227	196	189	204	0		2.43391	7.81473	11.3449	0	0
0	1518	218	194	200	204	0		5.2612	7.81473	11.3449	0	0
0	1674	236	191	185	204	0		1.80075	7.81473	11.3449	0	0
0	102	226	196	191	204	0		2.69146	7.81473	11.3449	0	0
0	1156	239	185	189	204	0		2.67971	7.81473	11.3449	0	0
0	1175	224	201	188	204	0		3.34141	7.81473	11.3449	0	0
0	1233	233	196	184	204	0		1.98173	7.81473	11.3449	0	0
0	1252	220	196	197	204	0		4.33006	7.81473	11.3449	0	0
0	1497	218	194	201	204	0		5.49785	7.81473	11.3449	0	0
0	1237	232	193	189	205	0		2.0265	7.81473	11.3449	0	0
0	1349	230	197	187	205	0		2.21935	7.81473	11.3449	0	0
0	1390	221	201	192	205	0		4.01795	7.81473	11.3449	0	0
1	1521	228	194	192	205	0		2.53042	7.81473	11.3449	0	0
0	1617	224	204	186	205	0		3.93898	7.81473	11.3449	0	0
0	1635	217	204	193	205	0		5.43823	7.81473	11.3449	0	0
0	1669	224	200	190	205	0		3.27266	7.81473	11.3449	0	0
1	1864	247	192	175	205	0		3.30627	7.81473	11.3449	0	0
0	1266	225	195	195	205	0		3.23788	7.81473	11.3449	0	0
0	1293	236	193	186	205	0		1.86315	7.81473	11.3449	0	0
0	1170	237	187	192	205	0		2.70442	7.81473	11.3449	0	0
0	1245	220	201	195	205	0		4.49736	7.81473	11.3449	0	0
1	1564	230	192	194	205	0		2.66877	7.81473	11.3449	0	0
0	1679	222	194	200	205	0		4.55723	7.81473	11.3449	0	0
1	1861	250	191	175	205	0		3.83025	7.81473	11.3449	0	0
0	1533	226	206	185	206	0		4.21019	7.81473	11.3449	0	0
0	1275	239	197	182	206	0		2.2501	7.81473	11.3449	0	0
1	1858	250	192	176	206	0		3.74547	7.81473	11.3449	0	0
1	1871	252	189	177	206	0		4.07765	7.81473	11.3449	0	0
0	1281	226	196	197	206	0		3.45048	7.81473	11.3449	0	0
0	1484	224	205	190	206	0		4.17767	7.81473	11.3449	0	0
0	1663	227	192	200	206	0		3.98787	7.81473	11.3449	0	0
0	1401	230	190	200	207	0		3.90932	7.81473	11.3449	0	0
0	1637	217	202	201	207	0		6.16498	7.81473	11.3449	0	0
0	1660	233	196	191	207	0		2.23311	7.81473	11.3449	0	0
0	1549	231	203	187	207	0		3.00133	7.81473	11.3449	0	0
0	1604	229	202	190	207	0		3.00853	7.81473	11.3449	0	0
0	1163	234	196	192	207	0		2.27849	7.81473	11.3449	0	0
1	1862	250	197	175	207	0		4.21624	7.81473	11.3449	0	0
0	1213	234	199	191	208	0		2.37433	7.81473	11.3449	0	0
0	1205	232	201	192	208	0		2.70938	7.81473	11.3449	0	0
0	1366	221	197	207	208	0		6.38697	7.81473	11.3449	0	0
1	1495	226	201	198	208	0		3.86163	7.81473	11.3449	0	0
0	1650	228	207	190	208	0		4.06772	7.81473	11.3449	0	0
0	1670	232	192	202	209	0		4.01546	7.81473	11.3449	0	0
0	1859	244	203	179	209	0		3.73044	7.81473	11.3449	0	0
1	1875	249	195	182	209	0		3.12873	7.81473	11.3449	0	0
0	1697	227	203	197	209	0		3.81159	7.81473	11.3449	0	0
0	1201	229	201	198	209	0		3.47129	7.81473	11.3449	0	0
1	1870	251	194	183	209	0		3.37921	7.81473	11.3449	0	0
1	1856	250	199	181	210	0		3.59772	7.81473	11.3449	0	0
0	1540	228	208	195	210	0		4.34047	7.81473	11.3449	0	0
0	1531	231	203	198	211	0		3.41428	7.81473	11.3449	0	0
1	1560	223	207	203	211	0		5.76439	7.81473	11.3449	0	0
0	1541	231	199	205	212	0		4.29422	7.81473	11.3449	0	0
0	1582	224	209	203	212	0		5.8646	7.81473	11.3449	0	0
1	1832	245	199	192	212	0		2.54628	7.81473	11.3449	0	0
1	1872	251	202	183	212	0		3.80469	7.81473	11.3449	0	0
0	1600	230	210	200	213	0		4.66195	7.81473	11.3449	0	0
1	1869	252	200	188	213	0		3.35218	7.81473	11.3449	0	0
0	1393	234	200	207	214	0		4.35108	7.81473	11.3449	0	0
1	1863	253	198	191	214	0		3.37299	7.81473	11.3449	0	0
0	1238	231	209	205	215	0		4.80124	7.81473	11.3449	0	0
0	1445	231	212	203	215	0		5.06956	7.81473	11.3449	0	0
0	1857	247	209	191	216	0		3.61536	7.81473	11.3449	0	0
0	1435	229	212	211	217	0		6.37846	7.81473	11.3449	0	0
0	1665	233	213	206	217	0		5.16231	7.81473	11.3449	0	0
0	1865	252	212	193	219	0		4.20484	7.81473	11.3449	0	0
1	1854	245	215	202	221	0		4.13196	7.81473	11.3449	0	0
0	1845	248	226	209	228	0		6.16065	7.81473	11.3449	0	0
0	1834	249	227	215	230	0		6.23754	7.81473	11.3449	0	0
0	1828	249	227	216	231	0		6.25591	7.81473	11.3449	0	0
#NULL!	#NULL!	249	207	187	214	1	1	3.78935	7.81473	11.3449	0	0
#NULL!	#NULL!	206	163	145	171	1	2	0.225257	7.81473	11.3449	0	0
#NULL!	#NULL!	183	142	126	150	1	3	0.161438	7.81473	11.3449	0	0
#NULL!	#NULL!	158	120	100	126	1	4	1.37105	7.81473	11.3449	0	0
#NULL!	#NULL!	143	104	81	109	1	5	2.68901	7.81473	11.3449	0	0
#NULL!	#NULL!	130	89	58	92	1	6	4.57177	7.81473	11.3449	0	0
#NULL!	#NULL!	103	74	63	80	1	7	10.0802	7.81473	11.3449	1	0
#NULL!	#NULL!	87	66	67	73	1	8	17.6218	7.81473	11.3449	1	1
#NULL!	#NULL!	84	68	80	77	1	9	23.686	7.81473	11.3449	1	1
#NULL!	#NULL!	60	46	83	63	1	10	46.0795	7.81473	11.3449	1	1
#NULL!	#NULL!	246	237	248	244	2	11	13.2698	7.81473	11.3449	1	1
#NULL!	#NULL!	243	231	219	231	2	12	8.18153	7.81473	11.3449	1	0
#NULL!	#NULL!	247	234	208	230	2	13	8.89808	7.81473	11.3449	1	0
#NULL!	#NULL!	234	218	186	213	2	14	7.1127	7.81473	11.3449	0	0
#NULL!	#NULL!	215	189	150	185	2	15	4.68814	7.81473	11.3449	0	0
#NULL!	#NULL!	160	126	86	124	2	16	3.12788	7.81473	11.3449	0	0
#NULL!	#NULL!	130	92	67	96	2	17	4.19894	7.81473	11.3449	0	0
#NULL!	#NULL!	96	65	52	71	2	18	11.0559	7.81473	11.3449	1	0
#NULL!	#NULL!	58	49	42	50	2	19	24.7529	7.81473	11.3449	1	1
#NULL!	#NULL!	41	36	32	36	2	20	31.8122	7.81473	11.3449	1	1
